# Supplementary material
Source: Frontiers journal article supplement (https://www.frontiersin.org/articles/26994)
Supplement: Data_Sheet_2.XLSX [file Data_Sheet_2.XLSX]

## Sheet: up-expressed
Ei-2/Oy-0/Wt-1	Ei-2/Wt-1	Oy-0/Wt-1	Ei-2/Oy-0	Di-2/Ler-0/St-0	Di-2/St-0	Ler-0/St-0	Di-2/Ler-0
AT5G03350	BX834828	AT3G50090	AT3G28210	AT5G64110	A_84_P230039	AT4G23310	A_84_P12277
AY087114	AT4G05540	AT3G44150	AT3G50090	AT5G37485	A_84_P309123	AT3G15536	A_84_P230039
AT5G61890	AT2G38390	AY087114	AT4G03450	AT1G19610	A_84_P700126	AT3G28510	A_84_P309123
AT3G50090	AT1G59930	AT5G40990	AT4G12490	AT5G40000	A_84_P751646	AT5G24200	A_84_P613285
AT5G40990	AT1G13480	AT5G10760	AT4G15270	AT5G44572	A_84_P751820	A_84_P767658	A_84_P700126
	AT1G12160	AT5G03350	AT5G03350	AT5G22540	A_84_P760217	AT4G21850	A_84_P750174
	AT1G59920	AT1G23840	AT5G40990	AT5G39670	A_84_P760514	AT1G55210	A_84_P750481
	AT5G35120	AT5G61890	AT5G61890	AT4G23240	A_84_P760629	AT3G44350	A_84_P751683
	AT1G19610		AY087114	AT1G44130	A_84_P767422	AT5G55450	A_84_P751820
	AT5G37485		CB185540	TA45631_3702	A_84_P767658	AT2G32680	A_84_P755532
	TC402900			AT4G05540	A_84_P785200	AT2G24850	A_84_P758733
	AT4G36430			AT5G06730	A_84_P843787	AT1G58225	A_84_P760217
	A_84_P750174			AT5G24110	A_84_P845146	AT4G04510	A_84_P760514
	AT1G78290			AT1G21520	A_84_P845241	AT5G64000	A_84_P760629
	AT1G43800			AT5G24540	A_84_P848023	AT1G34420	A_84_P763726
	AT3G03640			AT3G22930	A_84_P850889	AT4G23240	A_84_P764770
	A_84_P613285			AT5G10210	A_84_P854359	AT1G66860	A_84_P767422
	AT5G64110			AT1G73805	AA605363	AT4G11890	A_84_P767658
	AT4G16260			AT5G52760	AI994784	AT4G10500	A_84_P846056
	AT5G40010			AT4G03450	AK228733	AT3G11010	A_84_P847833
	AT1G30990			AT3G09270	AK229773	AT5G60800	A_84_P848023
	AT1G55780			AT5G26170	AT1G01010	AT4G04500	A_84_P850889
	AT4G05030			AT2G30766	AT1G01190	AY087114	A_84_P857613
	AT5G44420			AT2G43000	AT1G01370	AY099820	AA605363
	AT3G28510			AT2G38830	AT1G01560	AT1G71390	AI994784
	AT1G60470			AT1G65510	AT1G01680	AK229773	AK118176
	AT1G30730			AT5G57130	AT1G02230	AT5G55460	AK221907
	AT1G52810			AT4G04570	AT1G02360	EXLB3	AK222189
	AT2G34180			AT4G23210	AT1G02430	AT2G29120	AK228733
	AT5G24200			AK229773	AT1G02450	NP230685	AK229773
	AT2G26010			AT3G13950	AT1G02730	AT3G26210	AT1G01010
	AT1G33840			BX832756	AT1G02920	AT5G10760	AT1G01190
	AT3G30842			AT3G28580	AT1G02930	AT3G25020	AT1G01340
	AT5G10210			AT4G16820	AT1G03010	AT3G23120	AT1G01560
	AT1G78340			AT5G40990	AT1G03400	AT1G21520	AT1G01680
	DQ108857			AT5G10760	AT1G03660	AT4G21840	AT1G01910
	AT2G26020			AT1G67980	AT1G03800	AT5G24110	AT1G01940
	AT3G45130			AT3G23110	AT1G03850	AT2G46400	AT1G02090
	AT1G76930			AT3G28210	AT1G04110	AT4G36430	AT1G02230
	AT4G27450			AT4G36430	AT1G04530	AT1G08450	AT1G02360
	AT4G10860			AT2G46400	AT1G04600	AT4G13890	AT1G02405
	AT1G77380			AT3G48770	AT1G05210	AT2G25440	AT1G02430
	AT3G46070			AT1G26380	AT1G05630	AT4G23610	AT1G02450
	AT4G11655			AT2G26390	AT1G05800	AT1G44130	AT1G02920
	AT5G61490			AT1G16420	AT1G05880	AT3G57260	AT1G02930
	AT2G37530			TA26159_3702	AT1G06560	AT3G13950	AT1G03400
	AT5G03350			AT2G32680	AT1G07400	AT4G05540	AT1G03660
	AT4G25000			AT1G33720	AT1G08050	AT1G47480	AT1G03850
	AT5G55135			AT5G22380	AT1G08450	AT4G38560	AT1G04280
	AT1G77145			AY087114	AT1G08830	AT3G23530	AT1G04530
	AT1G08830			AT4G23150	AT1G09080	AT1G02430	AT1G04600
	AT5G07610			AT1G35210	AT1G09812	AT1G65845	AT1G05570
	TC396119			AT5G17760	AT1G09930	AT1G01680	AT1G05630
	AT4G33070			AT3G47480	AT1G09932	A_84_P848023	AT1G05680
	AT1G16530			AT1G09932	AT1G09935	AT5G24530	AT1G05780
	TA42103_3702			AT1G56540	AT1G10340	AT4G23150	AT1G05800
	AT3G29260			AT1G52770	AT1G11100	AT2G14560	AT1G05880
	AT3G29970			AT5G22530	AT1G11120	AT2G29110	AT1G06830
	AT5G24540			AT4G11070	AT1G11130	NP454661	AT1G07020
	AT1G52315			AT1G15520	AT1G11300	AT1G65500	AT1G07135
	AT5G56060			AT2G26190	AT1G12020	AT2G38830	AT1G07160
	AT1G21310			AT4G04500	AT1G12520	AT3G09940	AT1G07350
	AY087114			AT2G37130	AT1G13260	AT3G26470	AT1G07400
	AT2G05440			AT2G21900	AT1G13310	AT2G44240	AT1G07520
	AT5G06730			AT3G61280	AT1G13340	AT5G37485	AT1G07660
	AT5G44460			AT3G17690	AT1G13470	AT1G55780	AT1G07970
	AT5G62630			AT3G52430	AT1G14480	AT2G21910	AT1G08050
	AT2G26400			AT2G31865	AT1G14540	AT3G47380	AT1G08450
	AT2G14610			AT3G47800	AT1G14630	AT1G66880	AT1G08830
	AT1G73260			AT4G20000	AT1G14870	AT3G07520	AT1G08860
	AT4G13660			AT3G23120	AT1G15520	AT1G74710	AT1G08930
	AT1G70440			AT3G26320	AT1G15790	AT1G49000	AT1G09080
	AT5G05340			CD531672	AT1G15800	AT1G23840	AT1G09570
	AT3G28070			AT1G02230	AT1G16070	AT5G24540	AT1G09575
	AT4G14390			AT3G59100	AT1G16220	AT2G47130	AT1G09815
	AT2G17040			AT1G01680	AT1G16260	AT2G28210	AT1G09930
	AT3G29639			AT3G17400	AT1G16330	AT5G14330	AT1G09932
	AT2G38340			AT3G28510	AT1G16420	AT1G54010	AT1G09935
	AT5G64100			AT1G14540	AT1G16640	AT2G33080	AT1G10340
	AT3G11090			AT5G05340	AT1G17147	AT5G22550	AT1G10717
	AT5G17760			AT3G49110	AT1G17180	AT1G65985	AT1G11100
	AT2G03360			AT4G14400	AT1G17350	AT1G28480	AT1G11300
	AT5G20550			AT5G27420	AT1G17610	AT1G09080	AT1G11350
	AT1G16900			AT2G17820	AT1G18320	AT5G22570	AT1G11360
	AT1G54710			AT2G29110	AT1G18370	AT1G13470	AT1G11760
	AT5G53990			AT3G13100	AT1G18382	AT1G09932	AT1G12020
	AT2G39410			AT4G37780	AT1G18970	AT1G56120	AT1G12060
	AT3G17400			AT1G01560	AT1G18980	EG479048	AT1G12420
	AT3G49400			AT3G23290	AT1G19020	AT4G39830	AT1G12520
	AT4G08770			CB185540	AT1G19120	AT3G17690	AT1G13260
	AT5G22550			AT4G30640	AT1G19610	AT4G00970	AT1G13310
	AT4G11650			AT1G26390	AT1G20350	AT3G13435	AT1G13340
	AT1G21520			AT3G46090	AT1G20430	AT1G04600	AT1G13470
	AT3G62210			AT5G24200	AT1G20700	AT3G45330	AT1G13480
	AT5G44430			EXLB3	AT1G21240	AT2G04450	AT1G13520
	AT5G09290			AT1G71390	AT1G21390	AT1G72930	AT1G13980
	AT1G25460			NP226495	AT1G21520	AT4G13820	AT1G14040
	AT1G44130			AT2G04450	AT1G21550	AT2G02310	AT1G14060
	AT1G13700			AT3G21080	AT1G22780	AT1G16260	AT1G14070
	AT1G64070			AT4G17905	AT1G22890	AT4G10860	AT1G14200
	AT2G30766			AT1G58420	AT1G23020	AT3G61280	AT1G14210
	AT5G06740			AT3G05690	AT1G23090	AT4G03450	AT1G14480
	AT1G66700			AT4G04510	AT1G23100	AT2G23270	AT1G14510
	A_84_P755889			AT4G04540	AT1G23170	AT5G13320	AT1G14540
	AT1G30740			AT3G53232	AT1G23790	AT4G11070	AT1G14870
	AT4G11070			AT1G27890	AT1G23840	AT2G26190	AT1G15200
	AT1G42480			AT4G13820	AT1G24140	AT4G23160	AT1G15230
	AT3G12500			AT2G20142	AT1G24147	AT2G44290	AT1G15520
	TC397000			AT5G25250	AT1G25275	AT1G33720	AT1G15790
	AT5G18270			AT1G78290	AT1G26380	AT1G54000	AT1G15800
	AT5G44572			AT1G02930	AT1G26390	AT1G58300	AT1G15900
	AT4G27480			AT3G48100	AT1G26420	AT3G26690	AT1G16030
	AT5G15860			AT1G11300	AT1G27820	AT3G45290	AT1G16090
	AT3G15536			AT1G56120	AT1G27890	AT1G09935	AT1G16260
	AT1G65481			AT3G15536	AT1G28110	AT5G56050	AT1G16420
	AT1G72540			AT3G05730	AT1G28250	AT5G06720	AT1G16640
	AT4G32540			AT2G05440	AT1G29290	AT4G14400	AT1G17147
	AT1G62420			AT3G49400	AT1G29720	AT3G53150	AT1G17170
	AT3G07520			AT5G51440	AT1G29860	AT5G44390	AT1G17180
	AT2G21900			AT4G23160	AT1G29980	AT4G23170	AT1G17600
	AT1G36060			AT4G38560	AT1G30410	AT1G52315	AT1G17610
	AT5G43570			AT1G74710	AT1G30420	AT5G19240	AT1G18300
	AT2G36080			AT1G16260	AT1G30600	AT2G17040	AT1G18382
	NP227247			AT4G11655	AT1G30720	AT1G24147	AT1G18570
	TC377111			AT1G17610	AT1G30730	AT4G04570	AT1G18740
	AT5G53730			AT5G64000	AT1G30740	AT5G22380	AT1G18970
	AT3G28580			AT4G23310	AT1G31320	AT2G31880	AT1G18980
	AT2G42360			AT3G07520	AT1G32210	AT2G43620	AT1G19020
	AT1G10690			AT5G07610	AT1G33080	AT4G25900	AT1G19260
	AT3G13061			TA42103_3702	AT1G33560	AT2G31865	AT1G19610
	AT2G21185			AT1G17180	AT1G33610	AT3G57270	AT1G20350
	AT4G08780			AT1G69730	AT1G33720	TC379408	AT1G20690
	AT2G02230			AT3G43430	AT1G33760	TC374503	AT1G20700
	AT3G46080			AT1G61470	AT1G34180	AT3G48090	AT1G21100
	AT2G45360			AT5G18470	AT1G34420	AT3G13080	AT1G21110
	AT5G55150			AT3G13790	AT1G35140	AT4G21830	AT1G21120
	A_84_P760025			AT5G44570	AT1G35210	AT5G44585	AT1G21130
	AT5G22540			AT3G57640	AT1G35320	AT5G60900	AT1G21240
	AT2G38830			AT1G01010	AT1G35710	AT2G40740	AT1G21390
	AT5G60250			AT1G72240	AT1G36622	AT4G37780	AT1G21520
	AT4G37540			AT5G06740	AT1G36640	AT3G22930	AT1G21528
	AT4G21840			AT3G21150	AT1G36675	AT1G02450	AT1G21550
	AT2G37440			AT1G58225	AT1G42480	AT1G30900	AT1G21590
	NP227251			AT3G22060	AT1G42990	AT1G30420	AT1G21720
	AT2G39030			AT1G15790	AT1G43910	AT5G40010	AT1G21910
	TA29937_3702			AT3G50930	AT1G44130	AT3G56710	AT1G22230
	AT2G28510			AT4G23320	AT1G47395	AT1G70250	AT1G22240
	AT3G52740			AT1G30730	AT1G47480	AT1G75040	AT1G22890
	AT1G43910			AT4G02520	AT1G47890	AT3G22600	AT1G22985
	AT3G51860			AT3G50090	AT1G48145	CD531672	AT1G23020
	AT3G61198			AT5G60800	AT1G48410	AT5G61070	AT1G23030
	AT1G13090			AT5G56960	AT1G48610	AT2G33020	AT1G23090
	AT1G01010			AT4G37290	AT1G48630	AT3G28580	AT1G23710
	AT5G40000			AT1G36640	AT1G49000	AT2G28570	AT1G23830
	AT4G01895			AT1G10340	AT1G49150	AT4G23250	AT1G23840
	AT1G22440			AT5G42380	AT1G49750	AT5G64410	AT1G24130
	AT3G47040			AT1G13470	AT1G50240	AT3G16460	AT1G24140
	AT2G41250			AT1G30740	AT1G51055	AT5G01900	AT1G24147
	AT2G15220			AT2G03760	AT1G51070	A_84_P751820	AT1G25275
	AT1G26390			AT5G64120	AT1G51620	AT5G18470	AT1G25550
	AT5G62130			AT1G08830	AT1G51850	AT3G25882	AT1G25580
	AT5G16900			AT5G52750	AT1G51890	AT1G69520	AT1G26150
	AT5G08380			AT5G13080	AT1G52140	AT1G36640	AT1G26270
	AT4G22517			AT3G23230	AT1G52315	AT1G72060	AT1G26380
	AT1G64500			AT2G32020	AT1G52770	AT5G26690	AT1G26390
	AT2G36890			AT5G64870	AT1G52780	AT4G28460	AT1G26420
	AT2G41850			AT5G13320	AT1G53060	AT1G52780	AT1G26800
	TC371919			AT1G20700	AT1G53140	AT5G26170	AT1G27020
	AT5G46350			AT3G23250	AT1G53625	AT3G13610	AT1G27060
	AT1G63960			AT2G17040	AT1G54000	AT5G52760	AT1G27360
	AT3G60470			AT1G09930	AT1G54010	AT1G08830	AT1G27820
	AT2G23030			AT1G13340	AT1G54850	AT3G13437	AT1G27890
	AT1G05710			AT2G40740	AT1G55230	A_84_P760629	AT1G28110
	AT2G14560			AT1G72940	AT1G55450	AT3G13432	AT1G29290
	AT3G04320			AT5G24640	AT1G55780	AT3G50140	AT1G29640
	AT4G04632			AT5G46350	AT1G56120	AT4G39950	AT1G29720
	AT1G13520			AT1G23840	AT1G56150	AT2G37280	AT1G29860
	AT3G29250			AT3G45730	AT1G56423	AT3G51920	AT1G29920
	AT1G06180			AT2G28570	AT1G56520	TA50735_3702	AT1G29930
	AT4G39580			AT3G61390	AT1G56540	AT4G29740	AT1G30070
	AT4G17660			AT1G70470	AT1G58225	TA29588_3702	AT1G30370
	AT5G49730			AT2G21850	AT1G58245	AT2G28190	AT1G30410
	AT4G01610			BX834828	AT1G58300	AT2G20142	AT1G30420
	AT2G39675			AT2G44370	AT1G58420	AT4G24350	AT1G30720
	TA29936_3702			AT2G33080	AT1G59359	AT5G44910	AT1G30730
	AT1G52920			AT2G39675	AT1G59590	AT5G06740	AT1G30740
	DR262238			AT2G01818	AT1G59950	AT3G16660	AT1G30755
	AT5G46050			AT4G28460	AT1G60390	AT1G11300	AT1G31580
	A_84_P756101			AT3G04220	AT1G61260	AT1G61420	AT1G33030
	AT4G26200			AT5G24210	AT1G61470	AT3G57230	AT1G33080
	AT5G22570			AT5G21960	AT1G62422	AT3G54880	AT1G33470
	AT5G22555			AT1G12520	AT1G63150	AT3G23010	AT1G33520
	A_84_P760629			AT1G35710	AT1G63220	AT1G47395	AT1G33610
	AT1G33730			AT2G44840	AT1G63360	AT1G11670	AT1G33720
	AT3G56891			AT5G59820	AT1G64170	AT3G22235	AT1G33760
	AT1G73805			AT4G08780	AT1G65250	AT1G53625	AT1G33960
	AT5G10040			TA43931_3702	AT1G65470	AT3G52430	AT1G34047
	AT3G04520			AT4G17250	AT1G65500	AT5G44568	AT1G34180
	AT5G40230			AT3G26830	AT1G65510	AT1G58420	AT1G34420
	AT5G39850			AT3G48090	AT1G65710	AT2G33530	AT1G35140
	AT1G22980			AT2G30750	AT1G65985	AT4G08040	AT1G35210
	AT4G21680			AT1G72920	AT1G66170	AT5G40230	AT1G35580
	AT5G46130			AT3G13080	AT1G66173	AT5G60950	AT1G35710
	AT1G19530			AT5G61440	AT1G66480	AT3G48080	AT1G35730
	AT1G69880			AT3G09405	AT1G66600	AT3G14460	AT1G36622
	AT1G03850			AT5G55150	AT1G66700	AT1G72540	AT1G36640
	AT5G10380			AT3G02840	AT1G66880	AT5G38210	AT1G36675
	A_84_P766552			AT1G04600	AT1G66920	AT1G10340	AT1G42480
	AT4G38930			AT5G20230	AT1G66940	AT1G03660	AT1G42990
	AT2G24980			AT1G03660	AT1G67430	AT5G38900	AT1G43000
	AT5G65500			AT1G42480	AT1G67630	AT3G47480	AT1G43580
	AT2G34450			AT2G37280	AT1G67940	R65132	AT1G44130
	AT3G11260			AT1G63150	AT1G67970	AT5G19930	AT1G47395
	AT4G18870			AT2G02230	AT1G67980	BX834828	AT1G47480
	AT1G68320			AT5G55460	AT1G68765	AT2G15760	AT1G47890
	AT5G44990			AT5G60280	AT1G69700	A_84_P760119	AT1G48145
	AT2G43570			AT2G04070	AT1G69730	AT1G65484	AT1G48410
	AT5G11210			BP783345	AT1G69910	AT1G61475	AT1G49000
	AT5G64490			AT4G21840	AT1G69930	AT2G46150	AT1G49150
	AT3G57260			AT1G24140	AT1G70470	AT3G23510	AT1G49240
	AT2G25090			AT1G16640	AT1G71390	AT4G05020	AT1G49780
	AT3G21080			AT3G47010	AT1G72000	TA51700_3702	AT1G51620
	AT3G20370			AT4G15150	AT1G72240	AT1G59950	AT1G51700
	AT1G05570			AT1G02360	AT1G72540	AT5G46350	AT1G51850
	AT3G53210			AT3G13610	AT1G72730	AT3G50090	AT1G51890
	AT4G34412			AT1G55780	AT1G72890	AT1G22890	AT1G52140
	AT2G16595			AT5G44568	AT1G72920	AT1G14880	AT1G52200
	AT1G67980			AT4G05380	AT1G72940	AT3G46080	AT1G52315
	AT5G43860			AT1G12020	AT1G72950	AT1G26420	AT1G52330
	AT3G29810			AT2G33530	AT1G73540	AT2G46430	AT1G52420
	AT4G39403			AT2G28660	AT1G73650	A_84_P230039	AT1G52560
	AT5G26630			AT1G72890	AT1G73805	AT4G23260	AT1G52770
	AT3G28540			BE039144	AT1G74440	AT1G55230	AT1G52780
	AT3G12502			AT4G39830	AT1G74710	AT5G44570	AT1G53000
	AT3G13130			AT4G39580	AT1G75060	AT2G22770	AT1G53440
	AT2G40520			AT3G03920	AT1G76440	AT1G23850	AT1G53540
	AT1G65980			DR339542	AT1G76480	AT3G28890	AT1G53625
	AT1G48410			TA25819_3702	AT1G76540	AT3G26200	AT1G54000
	AT3G22930			AT4G14390	AT1G76740	AT4G00960	AT1G54010
	AT1G74140			AT2G15760	AT1G76930	AT5G64401	AT1G54050
	AT4G22070			AT1G02920	AT1G77360	AT1G35230	AT1G54850
	AT2G29150			AT3G48640	AT1G78290	AT1G14260	AT1G55040
	AT5G44570			AT5G25260	AT1G78340	AT5G57010	AT1G55230
	TA25743_3702			AT1G65250	AT1G79680	AT1G18980	AT1G55450
	AT2G38823			AT2G44790	AT1G79720	AT1G19250	AT1G55530
	AT5G65230			AT3G25727	AT1G79770	AT1G61460	AT1G55700
	AT4G18360			AT3G23530	AT1G80370	AT4G00700	AT1G55780
	AT3G13560			AT1G47890	AT1G80850	AT4G37290	AT1G56060
	AT5G53320			AT2G25440	AT2G01250	AT2G19130	AT1G56120
	AT1G15040			AT3G57260	AT2G01818	AT5G19230	AT1G56240
	AT2G18780			AT1G29860	AT2G02010	AT3G48640	AT1G56423
	AT4G37310			AT3G44350	AT2G02230	AT4G20000	AT1G56510
	AT3G15534			AT5G38260	AT2G02340	NP453103	AT1G56520
	AT5G51390			AT5G57010	AT2G03760	AT1G79680	AT1G56540
	AT3G56080			AT4G04490	AT2G04070	AT1G01010	AT1G57630
	AT4G21850			AT5G40010	AT2G04430	AT3G06890	AT1G57990
	AT5G07870			AT1G66880	AT2G04450	AT2G21850	AT1G58190
	AT4G08410			AT1G14870	AT2G04515	AT5G41160	AT1G58225
	AT3G09640			AT5G61070	AT2G05330	AT4G30640	AT1G58245
	AT5G17640			AT2G29120	AT2G05380	AT1G33760	AT1G58300
	BX838074			AT3G15450	AT2G05440	AT2G39675	AT1G58420
	AT3G04720			AT1G55450	AT2G07170	AT5G06730	AT1G59590
	AT2G26190			AT3G56770	AT2G07180	AT4G11470	AT1G59600
	AT4G28440			AT3G23510	AT2G07680	AT5G62630	AT1G59860
	AT1G29270			AT1G21390	AT2G07690	AT1G17750	AT1G59920
	AT2G30942			NP230685	AT2G13820	AT1G02360	AT1G59950
	AT2G21560			AT1G30410	AT2G14080	AT5G43910	AT1G61215
	AT1G77640			AT3G43250	AT2G14247	AT3G60120	AT1G61260
	AT4G20000			AT5G46520	AT2G15760	AT4G25110	AT1G61340
	A_84_P765621			AT4G32540	AT2G17040	AT1G30720	AT1G61360
	AT1G77120			AT3G13090	AT2G17820	AT4G39030	AT1G61370
	AT5G42030			AT1G02450	AT2G18500	AT1G56660	AT1G61470
	AT3G45730			TA52085_3702	AT2G18670	AT3G44870	AT1G62420
	AT1G52340			AT1G29290	AT2G18690	AT3G53232	AT1G62422
	AT5G37260			AT2G23270	AT2G19130	AT5G14930	AT1G62730
	AT1G30720			AT4G23170	AT2G19670	AT1G21310	AT1G63150
	BP822430			AT5G66390	AT2G19990	AT1G51800	AT1G63220
	BP867701			AT5G39680	AT2G20142	AT4G02330	AT1G63360
	AT1G77880			AT4G11890	AT2G20562	AT1G17610	AT1G63720
	AT2G18550			AT3G30840	AT2G21790	AT1G55450	AT1G63750
	AT1G58300			AY085891	AT2G21850	A_84_P700126	AT1G63950
	AT2G43510			AT2G26380	AT2G21900	AT1G61470	AT1G64065
	AT4G13890			AT2G04515	AT2G21910	AT1G14870	AT1G64170
	AT1G04600			AT5G55450	AT2G23270	AT5G65440	AT1G64385
	AT3G55790			AT5G54850	AT2G23320	AT5G16170	AT1G64610
	AT2G05995			AT1G79680	AT2G23830	AT3G28540	AT1G65250
	AT5G66390			AT2G41180	AT2G24490	AT2G43570	AT1G65500
	AT5G06370			AT1G59590	AT2G24700	AT3G10930	AT1G65510
	AT3G47480			A_84_P309123	AT2G24970	AT1G21270	AT1G65710
	AT4G32650			TA44809_3702	AT2G25000	AT3G22231	AT1G65985
	AT4G37720			AT3G44720	AT2G25200	AT3G30840	AT1G66050
	AT5G62920			AT5G64810	AT2G25440	AT1G15520	AT1G66080
	AT4G28820			NP453103	AT2G25470	TC397804	AT1G66160
	AT3G25727			AT1G14480	AT2G26130	AT1G36622	AT1G66170
	AT5G39720			TA48723_3702	AT2G26190	AT2G28510	AT1G66480
	AT1G55525			AT5G60440	AT2G26240	AT4G37710	AT1G66580
	AT1G49840			AT3G56710	AT2G26380	AT1G61560	AT1G66600
	AT3G50770			AT5G42830	AT2G26390	AT5G46050	AT1G66700
	AY084567			AT2G28510	AT2G26400	AT5G64810	AT1G66880
	AT4G24690			AT4G09770	AT2G26900	AT5G06330	AT1G66920
	N65547			AT3G16460	AT2G27310	AT1G26390	AT1G67150
	AT1G79210			AT5G59070	AT2G27590	AT5G47850	AT1G67470
	AT1G72940			AT1G29720	AT2G27660	AT1G68765	AT1G67520
	AT3G45410			AT5G36970	AT2G28160	AT3G21150	AT1G67970
	AT5G42830			AT4G37610	AT2G28190	AT2G23320	AT1G67980
	AT4G16690			AT4G14365	AT2G28210	AT1G64170	AT1G68000
	AT2G29090			AT1G02430	AT2G28460	AT5G64905	AT1G68330
	AT5G53920			AT3G17609	AT2G28510	AT4G11655	AT1G68390
	AT5G07820			AT1G68765	AT2G28570	AT3G23110	AT1G68765
	AT2G02750			AT5G43420	AT2G28660	AT5G63660	AT1G69730
	AT4G30270			AT1G18980	AT2G28940	AT5G40000	AT1G69880
	AT4G10090			AT3G26200	AT2G28950	AT3G04220	AT1G69890
	AT4G10500			AT3G26470	AT2G29100	A_84_P767422	AT1G69910
	AT2G21930			AT1G42990	AT2G29110	AT5G17330	AT1G69920
	AT5G43580			AT1G03850	AT2G29120	AT3G44720	AT1G69930
	AT3G47640			AT2G43570	AT2G30150	AT2G21060	AT1G70130
	AT5G07040			AT1G66920	AT2G30750	AT4G01895	AT1G70470
	AT5G03200			AT3G47380	AT2G30766	AT1G56540	AT1G71000
	AT4G38870			AT4G14450	AT2G30890	AT5G05300	AT1G71390
	AT1G52770			AT3G29000	AT2G31865	AT4G15280	AT1G71520
	AT5G26920			AT1G66170	AT2G31870	AT1G66170	AT1G71730
	AT3G26220			AT1G19020	AT2G31880	AT5G38310	AT1G72000
	AT4G21120			AT1G64170	AT2G32020	AT2G34940	AT1G72240
	AT5G40800			AT3G15640	AT2G32030	AT5G07770	AT1G72540
	AT1G20430			AT5G39020	AT2G32130	BX832756	AT1G72610
	AT1G52857			AT3G17010	AT2G32280	AT1G56550	AT1G72660
	AT3G09220			AT2G21910	AT2G32380	AT5G38260	AT1G72800
	AT4G32870			AT2G42140	AT2G32680	CB254609	AT1G72890
	AT3G07920			AT2G14080	AT2G33020	AT2G21900	AT1G72900
	AT3G14060			AT3G16660	AT2G33080	AT1G76640	AT1G72920
	AT3G56500			AT5G11410	AT2G33330	AT2G17120	AT1G72940
	AT3G11580			AT1G66480	AT2G33530	AT3G48450	AT1G73540
	AT3G01175			AT5G39580	AT2G33560	AT5G25930	AT1G73650
	AT5G04830			AT2G05330	AT2G33793	AT4G39190	AT1G73805
	AT5G06720			A_84_P767658	AT2G33860	AT5G11920	AT1G73810
	AT3G09270			AT2G28160	AT2G34300	A_84_P850889	AT1G73870
	AT5G40720			AT4G23810	AT2G34655	AT5G27060	AT1G74310
	AT5G20960			AT1G58300	AT2G34670	BP783345	AT1G74360
	AT5G66130			AT1G08450	AT2G34940	AT3G47800	AT1G74440
	AT5G03230			AT3G10930	AT2G35650	AT1G73020	AT1G74590
	AT5G56180			AT4G32800	AT2G35736	AT1G52800	AT1G74710
	AT5G23000			AT1G54000	AT2G36985	AT5G54850	AT1G75600
	AT1G13340			AT5G52740	AT2G37060	AT2G42360	AT1G76440
	AT5G65030			AI994784	AT2G37130	STP1	AT1G76480
	AT2G18390			AT5G16170	AT2G37195	AT1G11330	AT1G76600
	AT5G55490			AT3G56891	AT2G37280	AT2G30766	AT1G76680
	AT3G12490			AT3G28899	AT2G37510	AT3G14470	AT1G77145
	AT5G61890			AT1G73650	AT2G37925	AT3G53600	AT1G77360
	AT1G63590			BP803304	AT2G37970	TA48723_3702	AT1G78290
	AT2G13840			AT1G33080	AT2G38830	AT4G09770	AT1G78310
	AT1G35140			AY099820	AT2G38860	AT4G23140	AT1G78340
	AT5G62740			AT5G11140	AT2G39675	AT5G27420	AT1G78850
	AT2G42140			AT1G27820	AT2G40180	AT3G12220	AT1G78895
	AT2G32660			NP039098	AT2G40520	AT5G14700	AT1G79680
	AT2G10440			AT1G49000	AT2G40740	AT1G24140	AT1G79770
	AT5G01900			AT3G11080	AT2G40960	AT1G35710	AT1G80520
	AT1G70390			AT4G02330	AT2G41090	AT1G42480	AT1G80610
	AT3G44326			AT5G43910	AT2G41100	AT1G29720	AT1G80770
	AT5G16310			AT1G51620	AT2G41180	AT2G04070	AT2G01150
	A_84_P230039			AT4G21850	AT2G42140	AT3G47040	AT2G01630
	AT4G40020			AT5G22550	AT2G42260	AT4G14630	AT2G01818
	AT5G13080			AT3G57230	AT2G42360	AT1G64710	AT2G02010
	AT3G51540			AT2G44180	AT2G43000	AT2G37970	AT2G02061
	AT2G46400			AT3G53160	AT2G43570	TA50489_3702	AT2G02230
	AT3G19615			AT1G63360	AT2G43620	AT1G15790	AT2G02240
	AT1G56080			AT3G26760	AT2G43910	AT4G29810	AT2G02340
	AT3G56140			AT4G23030	AT2G44180	AT3G44860	AT2G02750
	AT4G25380			AT5G13710	AT2G44370	AT3G11340	AT2G03760
	AT1G26400			AT1G47395	AT2G44580	AT1G27890	AT2G03938
	AT5G65090			AT1G23090	AT2G44790	AT1G50430	AT2G04040
	AT1G07900			AT1G28110	AT2G44840	AT3G18080	AT2G04066
	AT3G48770			AT2G34655	AT2G45760	AT1G11610	AT2G04070
	AT3G53040			AT5G64100	AT2G46150	AT1G51860	AT2G04430
	BE039144			AT1G18382	AT2G46400	AT4G32800	AT2G04450
	AT5G63020			AT3G48320	AT2G46430	AT3G09270	AT2G04495
	AT1G02430			TA52206_3702	AT2G46450	AT5G41080	AT2G04515
	AT1G31290			AT3G46070	AT2G46810	TA28146_3702	AT2G04520
	AT3G15450			AT4G04745	AT2G46890	AT3G22060	AT2G05330
	AT4G36850			AT1G23020	AT2G47130	NP226495	AT2G05380
	AT4G16330			AT1G51890	AT2G47140	AT2G25470	AT2G05440
	AT5G01870			AT3G46080	AT2G47550	AT2G15080	AT2G05540
	AT1G56165			AT3G55660	AT2G47680	AT2G44180	AT2G07180
	AK119008			AT2G42360	AT3G02180	AT2G18670	AT2G11910
	AT3G10815			AT5G60930	AT3G02270	AT3G26230	AT2G14080
	AT3G19490			AT5G01900	AT3G02820	AT3G28210	AT2G15220
	AT4G17695			AT3G21781	AT3G02840	AT2G22760	AT2G15240
	AT3G47340			AT4G34412	AT3G03130	AT3G47210	AT2G15480
	AT3G50090			BP867701	AT3G03920	AT1G13260	AT2G15490
	AT3G45300			AT3G28340	AT3G04220	AT5G22530	AT2G15760
	AT1G33265			AT1G79770	AT3G04920	AT2G44790	AT2G15780
	AT5G07790			AT2G05380	AT3G05650	AT1G33610	AT2G16060
	AT1G47820			AT5G47850	AT3G05690	AT4G21926	AT2G17040
	AT3G44300			AT4G16970	AT3G05730	AT4G13920	AT2G17740
	AT5G04750			AT3G57270	AT3G05740	AT4G32540	AT2G17820
	AT1G01725			AT1G62422	AT3G06450	AT4G23190	AT2G17900
	AT4G02050			AT5G05790	AT3G06890	AT1G20350	AT2G18670
	DR205022			AT4G29980	AT3G07520	AT5G44820	AT2G18690
	AT3G11660			AT5G44990	AT3G07540	AT2G40180	AT2G19120
	AT3G27070			AT5G60950	AT3G07580	AT1G30730	AT2G19130
	AT5G44610			AT2G19990	AT3G07720	AT2G32380	AT2G19180
	AT5G08320			AT4G25110	AT3G09070	TA44809_3702	AT2G19460
	AT5G22530			AT3G10720	AT3G09260	AT2G29100	AT2G19710
	AT4G18980			AT5G48540	AT3G09270	AT5G64870	AT2G19990
	AT1G65510			AT1G36622	AT3G09350	AT3G13790	AT2G20142
	AT4G21610			AT1G17147	AT3G09405	AT3G18250	AT2G20465
	AT5G26170			AT1G55230	AT3G09940	AT2G44390	AT2G20550
	A_84_P760248			A_84_P848023	AT3G10010	AT2G30770	AT2G20560
	AT5G53970			AT3G28540	AT3G10110	BP815481	AT2G20562
	AT3G21870			AT2G28190	AT3G10720	AT5G48930	AT2G20670
	AT2G20670			AT2G31880	AT3G10930	AT4G29980	AT2G21290
	A_84_P848023			AT3G45290	AT3G11010	DR339542	AT2G21640
	AT3G50030			AT2G35736	AT3G11080	AT2G22330	AT2G21650
	AT1G20350			AT1G66700	AT3G13061	AT3G11720	AT2G21780
	AT3G21420			AT5G01540	AT3G13080	AT4G23210	AT2G21840
	AT5G54750			AT3G21140	AT3G13090	AT1G09930	AT2G21850
	AT2G39460			CD530924	AT3G13100	AT1G51890	AT2G21900
	AT5G14000			AT4G36030	AT3G13432	AT3G25727	AT2G21910
	AT3G09960			AT2G25470	AT3G13435	AT4G15150	AT2G22540
	AT3G53232			AT3G07580	AT3G13610	AT3G53310	AT2G23270
	AT4G09080			AT2G04430	AT3G13790	AT4G02520	AT2G23290
	TA25819_3702			AT3G09940	AT3G13950	AT2G14080	AT2G23300
	AT2G43610			AT2G29100	AT3G14060	AT1G72280	AT2G23320
	AT5G01610			AT1G18970	AT3G14240	AT3G16220	AT2G23770
	AT5G39110			A_84_P230039	AT3G14740	AT4G25490	AT2G23830
	AT2G40880			AT1G72540	AT3G14990	AT5G37660	AT2G24100
	AT5G39670			AT3G09350	AT3G15170	AT1G65486	AT2G24600
	TC406361			AT5G50720	AT3G15270	AT1G72940	AT2G24765
	AT5G48410			AT1G07400	AT3G15390	AT5G19250	AT2G25140
	AT2G24700			AT5G05300	AT3G15450	AT5G09290	AT2G25200
	AT2G14070			AT1G26420	AT3G15518	AT4G17500	AT2G25240
	AT4G16790			AT2G27660	AT3G15530	AT4G02110	AT2G25440
	AT3G46090			AT1G30720	AT3G15536	AT1G64400	AT2G25470
	AT5G15870			AT3G45330	AT3G15640	AT1G74440	AT2G25735
	AT5G54610			AT1G48410	AT3G15680	AT5G64110	AT2G26130
	AT4G36820			AT2G32380	AT3G16080	AI994784	AT2G26150
	AT5G63750			AT5G11970	AT3G16220	AT3G61300	AT2G26190
	AT1G03340			AT1G47480	AT3G16420	AT3G25780	AT2G26240
	AT5G17300			AT3G54880	AT3G16450	AT3G26220	AT2G26380
	AT2G38380			AT5G37660	AT3G16460	AT1G17147	AT2G26390
	TA35380_3702			NP502509	AT3G16660	AT4G16820	AT2G26530
	AT4G37710			AT5G38250	AT3G17010	AT5G60280	AT2G26560
	AK230421			AT5G03610	AT3G17380	AT1G65610	AT2G26940
	AT5G43830			AT5G15870	AT3G17400	AT3G47010	AT2G27310
	AT1G15760			AT2G34940	AT3G17609	AT3G50930	AT2G27590
	AT2G28780			AT5G38210	AT3G17690	AT1G66980	AT2G27660
	AT5G61430			AT5G61740	AT3G17910	AT4G23180	AT2G28160
	AT3G51960			AT3G26600	AT3G18050	AT5G21900	AT2G28190
	AT1G52900			AT5G14930	AT3G18130	AT3G23230	AT2G28210
	AT5G49690			A_84_P760217	AT3G19050	AT2G04515	AT2G28460
	AT1G52560			AT3G53310	AT3G19184	AT1G65690	AT2G28510
	AT2G43420			A_84_P760629	AT3G19400	AT1G67060	AT2G28570
	AT4G15280			AT2G43620	AT3G20150	AT4G04540	AT2G28660
	AT3G10020			AT2G33020	AT3G21080	AT4G39630	AT2G28940
	AT2G47200			AT2G37970	AT3G21140	ES444444	AT2G29100
	AT3G60670			AT5G19930	AT3G21150	AT1G66700	AT2G29110
	AT1G13310			AT5G45000	AT3G21781	AT1G04530	AT2G29120
	AT1G72730			AT3G11010	AT3G21900	AT1G26410	AT2G29150
	AT5G24165			AT3G16220	AT3G22060	BP803304	AT2G29190
	AT5G47610			AT1G34420	AT3G22230	AT1G16670	AT2G29500
	AT3G21770			AT4G08770	AT3G22930	AT1G69930	AT2G29720
	AT4G19220			AT1G56423	AT3G23010	AT5G11210	AT2G30140
	EXLB3			AT3G15530	AT3G23110	AT1G69910	AT2G30400
	AT1G48605			AT4G23760	AT3G23120	AT2G43000	AT2G30670
	AT1G78190			AT3G13435	AT3G23230	AT3G42130	AT2G30750
	AT1G16500			TC374503	AT3G23250	AT1G52770	AT2G30766
	AT3G58270			AT5G44820	AT3G23290	AT5G50350	AT2G31020
	AT2G37060			AT4G39630	AT3G23510	AT1G12020	AT2G31230
	AT5G04853			AT4G21070	AT3G23530	AT3G07720	AT2G31410
	BP641711			AT5G03160	AT3G23740	AT3G63430	AT2G31865
	AT4G19925			AT3G26690	AT3G23830	AT3G26830	AT2G31870
	AT2G44390			AT5G37740	AT3G25600	AT3G12910	AT2G31880
	A_84_P750600			NP454661	AT3G25727	AT5G40990	AT2G32020
	AT1G52740			AT3G60420	AT3G25780	CB185540	AT2G32030
	AT4G34030			AT4G09100	AT3G25980	AT4G12735	AT2G32120
	AT5G24550			AT5G06720	AT3G26200	AT5G65130	AT2G32130
	AT2G36780			AT4G11370	AT3G26220	AT4G23130	AT2G32200
	AT1G23550			AT2G25200	AT3G26320	AT5G44990	AT2G32380
	AT3G01740			AT4G39030	AT3G26470	TA45631_3702	AT2G32550
	AT1G69828			AT2G46150	AT3G26600	AT4G39260	AT2G32680
	AT2G31865			AT1G78340	AT3G26680	AT3G49400	AT2G33020
	AT1G67820			TA50489_3702	AT3G26690	AT5G24550	AT2G33080
	AT1G55000			AT5G44585	AT3G26760	AT3G52870	AT2G33370
	TA38646_3702			AT3G15518	AT3G26830	AT4G01110	AT2G33530
	AT1G26930			NP236409	AT3G27060	AT1G47890	AT2G33630
	TA25750_3702			AT4G13575	AT3G27070	AT4G25470	AT2G33710
	AT5G23320			AT3G27860	AT3G27330	AT1G33080	AT2G33790
	AT3G04070			AT5G65440	AT3G27360	AT2G26390	AT2G33810
	AT1G21720			AT3G51920	AT3G27860	AT5G50560	AT2G34450
	AT5G56050			AT5G03350	AT3G28210	AT3G07600	AT2G34655
	AT4G02390			TC362032	AT3G28220	AT2G47000	AT2G34940
	AT1G65500			AT3G47040	AT3G28340	AT2G27660	AT2G35733
	AY099820			AT3G14060	AT3G28480	AT4G04220	AT2G35736
	AT2G18735			AT5G36925	AT3G28510	AT5G43420	AT2G35930
	AT3G47050			AT1G54850	AT3G28540	AT5G66620	AT2G35980
	AT1G71220			AT5G45480	AT3G28580	AT5G12470	AT2G36630
	AT2G33160			AT4G39190	AT3G28857	AT5G58150	AT2G36650
	AT4G17160			AT4G13190	AT3G28899	AT1G08050	AT2G36750
	AT4G39404			AT4G23140	AT3G29000	AT4G11911	AT2G36800
	AT5G42240			AT5G09290	AT3G30340	AT2G47140	AT2G36930
	AT5G60680			AT3G50770	AT3G30840	AT1G26380	AT2G37060
	AT3G53480			NP206666	AT3G43250	AT1G80460	AT2G37130
	AT1G52420			AT3G25780	AT3G43430	AT4G15270	AT2G37190
	AT2G04100			AT5G04930	AT3G43800	AT4G23460	AT2G37280
	AT1G52342			AT5G11210	AT3G44150	AT1G07650	AT2G37410
	A_84_P846860			AT5G48580	AT3G44350	AT1G70390	AT2G37430
	AT2G30500			AT2G38860	AT3G44480	AT5G61890	AT2G37950
	AT2G23170			AT5G38300	AT3G44720	AY085891	AT2G37970
	TA28705_3702			AT4G17490	AT3G45290	AT5G64120	AT2G38290
	AT4G08790			AT1G21240	AT3G45330	AT3G21930	AT2G38340
	AT5G48820			AT2G20562	AT3G45730	AT1G69820	AT2G38470
	AT4G36050			AT5G26690	AT3G46070	AT5G39580	AT2G38600
	AT2G41945			AT1G21550	AT3G46080	A_84_P848173	AT2G38830
	AT1G33560			TC397804	AT3G46090	AT3G16450	AT2G38860
	AT1G19400			AT2G45760	AT3G47010	AT5G03350	AT2G39030
	AT2G29110			AT4G23610	AT3G47040	AT5G02290	AT2G39210
	AT5G14160			AT2G40180	AT3G47050	AT3G48770	AT2G39675
	AT5G59470			AT2G31870	AT3G47200	AT5G52750	AT2G39820
	AT3G48580			AT4G32860	AT3G47380	AT4G33100	AT2G40095
	AT1G34180			AT2G28210	AT3G47480	AT3G25180	AT2G40140
	AT1G14870			AT1G67970	AT3G47800	AT1G02920	AT2G40180
	AT5G57560			AT1G51850	AT3G48090	AK227999	AT2G40340
	AT1G52855			AT5G25930	AT3G48100	AT2G45760	AT2G40520
	AT3G45970			AT1G04530	AT3G48320	AT1G48410	AT2G40740
	AT3G09900			AT2G40520	AT3G48640	AT2G31810	AT2G40765
	AT2G31190			AT4G02110	AT3G48770	AT1G69730	AT2G41100
	AT1G02750			AT1G76440	AT3G48870	TA27368_3702	AT2G41180
	AT5G01250			AT5G64905	AT3G49110	CD530924	AT2G41440
	AT5G66690			AT5G07820	AT3G49400	AT3G23290	AT2G41640
	AT2G03750			AT1G25275	AT3G50060	AT5G60980	AT2G41710
	AT2G25950			AT3G50800	AT3G50090	AT3G44150	AT2G41730
	AT1G71390			AT1G01190	AT3G50770	A_84_P760217	AT2G41835
	AT5G63640			AT5G38900	AT3G50800	AT3G11080	AT2G42140
	AT1G13600			AT5G45470	AT3G50850	AT1G27695	AT2G42360
	AT1G17310			AT3G14990	AT3G50870	AT3G49110	AT2G43000
	AT4G21150			AT1G54010	AT3G50930	AT2G23830	AT2G43570
	AT1G52800			AT5G42440	AT3G51280	AT1G61500	AT2G43620
	AT1G80110			AT3G61300	AT3G51330	AT4G14365	AT2G43720
	AT5G59720			AT5G20960	AT3G51920	AT2G18690	AT2G43910
	AT4G21830			AT2G47680	AT3G52430	AT1G72890	AT2G44180
	AT1G66860			AT3G44480	AT3G53160	AT5G25440	AT2G44370
	AT4G15610			AT5G10440	AT3G53190	AT1G01560	AT2G44790
	AT1G23870			AT4G39950	AT3G53232	AT1G72920	AT2G44840
	TA30944_3702			AT1G65500	AT3G53310	AT3G23250	AT2G45620
	AT2G21780			AT1G59950	AT3G54180	AT1G12950	AT2G45630
	BX838768			AT3G10010	AT3G54260	AT3G50850	AT2G45760
	AT3G48410			AT1G72000	AT3G54470	TA43931_3702	AT2G46150
	AT5G56200			AT5G51590	AT3G54880	AT4G23470	AT2G46240
	AT1G62262			AT4G29740	AT3G54920	TC376113	AT2G46400
	AT1G68630			AT3G13432	AT3G55510	AT2G22320	AT2G46430
	AT1G68238			AT2G37060	AT3G55660	AT2G30750	AT2G47130
	BX838453			AT3G07720	AT3G56160	AT5G67340	AT2G47140
	AT2G15780			AT5G03390	AT3G56710	NP455687	AT2G47180
	AT4G09750			AT2G43910	AT3G56770	AT5G39450	AT2G47260
	AT2G05630			AT2G02340	AT3G56891	AT4G08780	AT2G47680
	AT5G38270			AT4G37490	AT3G57030	AT3G21080	AT2G48030
	AT1G19080			AT1G09935	AT3G57230	AT2G46140	AT3G01290
	AT4G29905			ES444444	AT3G57260	AT2G47015	AT3G01329
	AT2G46750			AT5G08240	AT3G57270	AT3G17400	AT3G01600
	AT5G17330			AT1G34180	AT3G57640	AT1G16420	AT3G02490
	AT4G08950			AT4G11470	AT3G57860	AT5G43066	AT3G02560
	AT3G57950			AT5G61890	AT3G59100	AT1G62930	AT3G02800
	DQ108747			AT1G13260	AT3G59550	AT3G13100	AT3G02840
	AT5G50590			AT1G58245	AT3G60420	AT1G65481	AT3G02990
	AT3G10790			AT1G69930	AT3G60470	AT1G72240	AT3G03640
	AT3G52480			AT1G33760	AT3G61100	AT4G21940	AT3G03920
	AT4G30430			AT3G23010	AT3G61280	AT1G65710	AT3G04110
	TA31885_3702			AT1G11100	AT3G61300	AT3G60420	AT3G04220
	AT3G26470			AT5G67340	AT3G61390	AT5G58680	AT3G04765
	AT1G33490			AT2G28940	AT3G62210	AT1G13310	AT3G05320
	AT1G18330			AT1G74440	AT3G62530	AT1G09430	AT3G05360
	AT4G02330			AT4G24350	AT4G00960	AT5G37740	AT3G05370
	AT2G39920			AT1G33610	AT4G01895	AT1G64160	AT3G05560
	AT4G13160			AT5G02220	AT4G02110	AT3G25600	AT3G05690
	AT4G27670			AT1G24147	AT4G02330	AT1G63740	AT3G05730
	AT3G10190			AT5G50200	AT4G02420	AT5G38990	AT3G05741
	TA30079_3702			AT1G53625	AT4G02450	AT3G50770	AT3G05860
	AT5G13330			AT3G54180	AT4G02520	AT1G59590	AT3G05950
	AT5G43410			AT4G15410	AT4G02800	AT4G19370	AT3G06435
	AT3G10780			AT2G26130	AT4G03100	AT2G07180	AT3G06890
	AT5G64810			AT5G64401	AT4G03450	NP221851	AT3G07090
	AT5G56970			AT3G06890	AT4G04490	AT5G20230	AT3G07150
	TA27460_3702			AT3G09260	AT4G04500	AT2G05320	AT3G07195
	AT1G09415			AT1G22890	AT4G04510	AT5G03390	AT3G07520
	AT1G05620			AT3G28480	AT4G04540	AT1G68620	AT3G07580
	AT1G68440			AT4G15070	AT4G04570	AT5G55120	AT3G07720
	AT3G52905			AT4G19925	AT4G04745	AT3G47050	AT3G07800
	AT5G01880			AT5G66000	AT4G05380	AT5G13080	AT3G08970
	TA49410_3702			AT2G18690	AT4G05540	NP502509	AT3G09000
	AT1G59700			AT5G44390	AT4G05590	NP236409	AT3G09020
	AT5G14420			AT4G08040	AT4G08040	AT3G10720	AT3G09032
	AT5G40990			AT3G16450	AT4G08480	AT2G38860	AT3G09035
	AT4G27260			AT1G66600	AT4G08770	AT2G28660	AT3G09260
	AT3G22550			AT5G02780	AT4G08780	AT4G14390	AT3G09270
	AT4G39830			AT5G07770	AT4G09100	AT3G17609	AT3G09350
	AT1G09740			AT4G10860	AT4G09770	AT5G64890	AT3G09405
	AT3G45590			AT3G26220	AT4G10450	AT1G62300	AT3G09450
	AT3G55490			AT4G25490	AT4G10500	AT3G59100	AT3G09640
	AT4G34360			A_84_P850889	AT4G10860	AT5G39100	AT3G09680
	AT3G07860			A_84_P767422	AT4G11070	AT3G09960	AT3G09870
	AT1G22065			AT5G46050	AT4G11370	AT1G27820	AT3G09940
	AT5G65020			AT5G62630	AT4G11470	AT4G04745	AT3G10010
	AT1G02380			AT1G52140	AT4G11655	A_84_P757545	AT3G10020
	AT2G41640			AT1G08050	AT4G11850	AT1G66600	AT3G10190
	AT2G28240			AT2G32030	AT4G11890	AT5G08240	AT3G10510
	AT1G02230			AT1G05800	AT4G13190	AT5G25260	AT3G10720
	AT4G34630			AT1G09080	AT4G13235	AT1G42990	AT3G10730
	AT5G63090			AT2G32130	AT4G13575	AT1G31280	AT3G10780
	AT5G66220			AT3G47050	AT4G13820	AT5G40430	AT3G10815
	AT5G05365			AT5G11920	AT4G13890	AT4G13190	AT3G10930
	AT4G01430			AT1G61260	AT4G14310	AT1G17860	AT3G10986
	AT1G52870			AT4G23190	AT4G14365	AT5G36970	AT3G11010
	AT5G03050			AT4G13890	AT4G14390	AT5G38250	AT3G11080
	AT3G07150			AT5G06820	AT4G14400	AT2G28160	AT3G12050
	AT5G01840			AT5G12480	AT4G14420	AT4G01720	AT3G12300
	AT2G21850			AT1G56520	AT4G14450	AT4G31230	AT3G12320
	AT5G35490			AT5G11000	AT4G14713	AT4G13850	AT3G12500
	NP226287			AT1G03400	AT4G14905	AT1G35140	AT3G12600
	AT5G57510			AT2G23320	AT4G15070	NP039098	AT3G12760
	AT1G49032			AT2G28460	AT4G15150	AT1G70530	AT3G13020
	AT3G61390			AT2G27310	AT4G15410	AT3G09830	AT3G13080
	AT2G44380			AT2G02010	AT4G15640	AT5G50660	AT3G13090
	AT5G46180			AT1G35140	AT4G16650	AT3G46090	AT3G13100
	AT3G25600			AT4G23250	AT4G16700	AT3G47540	AT3G13432
	AT1G55210			AT3G21900	AT4G16820	AT5G05790	AT3G13435
	AT3G06850			AT5G60980	AT4G16890	AT3G21920	AT3G13610
	AT2G30670			AT1G30420	AT4G16970	AT3G28480	AT3G13790
	AT5G52720			AT4G18870	AT4G17250	AT4G16970	AT3G13950
	AT3G15650			AT2G07180	AT4G17490	AT2G43910	AT3G14060
	AT5G65510			AT1G76480	AT4G17905	AT1G05800	AT3G14080
	AT1G60420			A_84_P751820	AT4G18590	AT2G47640	AT3G14200
	AT1G64940			AT1G05630	AT4G18870	AT5G20960	AT3G14930
	AT4G32050			AT1G77360	AT4G19925	AT5G52600	AT3G14990
	AT3G52748			AT2G46430	AT4G20000	AT3G10010	AT3G15356
	AT3G45030			AT2G27590	AT4G21070	AT5G06820	AT3G15450
	AT3G11720			AT4G01895	AT4G21840	AT4G37610	AT3G15518
	AT4G14270			AT2G41100	AT4G21850	AT1G05880	AT3G15530
	AT5G60800			AT1G49150	AT4G22490	AT5G42830	AT3G15534
	AT2G40390			AT5G56050	AT4G22753	AT5G39180	AT3G15536
	AT5G64780			AT1G05880	AT4G22900	AT2G03760	AT3G15640
	AT2G21320			AT2G26240	AT4G23030	AT3G07580	AT3G15760
	AT4G25330			AT1G65710	AT4G23140	AT3G09490	AT3G16050
	AT1G34380			AA605363	AT4G23150	TA44221_3702	AT3G16220
	AT4G14713			AT1G52780	AT4G23160	TA25979_3702	AT3G16450
	AT2G37770			AT1G48145	AT4G23170	AT2G04430	AT3G16460
	AT2G05540			AT1G73540	AT4G23190	AT1G61120	AT3G16530
	TA34939_3702			A_84_P700126	AT4G23210	AT2G41180	AT3G16660
	AT5G18920			AT5G17330	AT4G23240	AT2G19190	AT3G17010
	AT2G16430			AT1G65985	AT4G23250	AT5G07322	AT3G17400
	AT1G16570			AT1G52315	AT4G23310	AT4G01740	AT3G17609
	TA50028_3702			AT4G32720	AT4G23320	AT5G02780	AT3G17611
	AT5G58240			AK228733	AT4G23610	AT2G47680	AT3G17690
	AT5G05250			AT5G48930	AT4G23720	AT1G02710	AT3G18030
				AT5G41750	AT4G23760	AT1G24150	AT3G18710
				AT3G44150	AT4G23770	AT5G24640	AT3G19010
				AT3G56160	AT4G23810	AT1G61250	AT3G19250
				AT4G08480	AT4G23880	AT2G26380	AT3G19360
				TA25979_3702	AT4G24350	TA27747_3702	AT3G19615
				AT2G23830	AT4G24540	AT2G44840	AT3G20960
				AT1G15800	AT4G25110	AT2G40520	AT3G21080
				AT4G39260	AT4G25490	TA39766_3702	AT3G21140
				AT5G64890	AT4G26280	BE039144	AT3G21150
				AT3G25600	AT4G27260	AT3G57640	AT3G21780
				AT1G20350	AT4G28250	AT5G61010	AT3G21781
				AT1G63220	AT4G28460	AT4G16260	AT3G21900
				AT2G47140	AT4G29110	A_84_P756021	AT3G22060
				AT4G11850	AT4G29740	AT3G17700	AT3G22370
				AT2G47130	AT4G29980	AT3G28930	AT3G22660
				AT3G50850	AT4G30230	AT2G32210	AT3G22910
				AT4G00960	AT4G30610	TC398983	AT3G22930
				AT5G46295	AT4G30640	AT3G10790	AT3G23010
				EG479048	AT4G31700	AT2G13790	AT3G23110
				AT2G18670	AT4G32540	AT3G05730	AT3G23120
				AT3G50060	AT4G32720	AT1G65510	AT3G23220
				AT3G51330	AT4G32800	AT3G51330	AT3G23230
				AT5G33390	AT4G32860	AT2G03570	AT3G23250
				AT4G18590	AT4G34412	AT1G03850	AT3G23290
				A_84_P760514	AT4G35020	AT2G32140	AT3G23510
				AT2G19130	AT4G36030	AT5G42440	AT3G23530
				AT5G15360	AT4G36430	AT4G27070	AT3G23550
				AT1G13310	AT4G36570	AT1G63360	AT3G23560
				TA27368_3702	AT4G36620	AK228733	AT3G24280
				AT1G69910	AT4G37290	AT4G38420	AT3G24420
				AT3G26680	AT4G37490	AT2G34655	AT3G24982
				AT4G10500	AT4G37610	AT5G24210	AT3G25250
				AT5G48657	AT4G37750	AT1G19920	AT3G25600
				AT5G36920	AT4G37780	AT1G56520	AT3G25610
				AT5G38310	AT4G38560	AT3G07560	AT3G25727
				AT1G36675	AT4G39030	AT2G27590	AT3G25780
					AT4G39190	AT2G29990	AT3G25900
					AT4G39260	AT2G05330	AT3G26200
					AT4G39404	AT2G44380	AT3G26220
					AT4G39580	AT5G15870	AT3G26320
					AT4G39630	AT5G12880	AT3G26470
					AT4G39830	AT2G26440	AT3G26500
					AT4G39950	AT5G19110	AT3G26600
					AT5G01540	AT1G51760	AT3G26680
					AT5G01620	AT4G18590	AT3G26690
					AT5G01900	AT5G50670	AT3G26760
					AT5G02220	AT2G29340	AT3G26830
					AT5G02760	AT4G37490	AT3G27630
					AT5G02780	AT4G13575	AT3G27680
					AT5G02820	AT3G43430	AT3G27770
					AT5G03160	AT5G56960	AT3G27860
					AT5G03350	AT2G42950	AT3G28210
					AT5G03390	AT5G66390	AT3G28340
					AT5G03610	AT2G32130	AT3G28450
					AT5G04320	AT1G61260	AT3G28480
					AT5G04790	AT1G49150	AT3G28510
					AT5G04930	AT3G04210	AT3G28540
					AT5G05250	A_84_P309123	AT3G28580
					AT5G05300	AT5G46500	AT3G28899
					AT5G05340	AT5G25250	AT3G29000
					AT5G05510	AT1G78290	AT3G29034
					AT5G05790	CEN2	AT3G29310
					AT5G06000	AT5G48580	AT3G30840
					AT5G06720	AT1G14540	AT3G43250
					AT5G06730	AT5G06320	AT3G43400
					AT5G06740	NP237458	AT3G43430
					AT5G06820	AT3G15530	AT3G43980
					AT5G07610	AT5G11410	AT3G44150
					AT5G07770	AT5G65500	AT3G44350
					AT5G07820	AT2G30590	AT3G44400
					AT5G08000	AT5G45740	AT3G44480
					AT5G08240	AT1G02930	AT3G44630
					AT5G08330	AT1G80840	AT3G44720
					AT5G08620	AT2G04400	AT3G45060
					AT5G09290	NP456998	AT3G45290
					AT5G10210	AT1G51780	AT3G45330
					AT5G10390	AT5G36920	AT3G45500
					AT5G10400	AT1G19610	AT3G45650
					AT5G10440	AT3G04720	AT3G45730
					AT5G10560	BP861508	AT3G46070
					AT5G10760	AT4G23760	AT3G46080
					AT5G11000	AT1G21550	AT3G46090
					AT5G11140	AT4G38480	AT3G46580
					AT5G11190	AT5G37070	AT3G46620
					AT5G11210	AT2G42140	AT3G46690
					AT5G11410	AT4G11850	AT3G47010
					AT5G11920	AT3G50470	AT3G47040
					AT5G11970	AT4G28940	AT3G47050
					AT5G12480	AT3G15450	AT3G47090
					AT5G13080	AT1G18970	AT3G47380
					AT5G13140	AT4G17490	AT3G47480
					AT5G13320	AT3G03920	AT3G47570
					AT5G13710	AT4G11230	AT3G47800
					AT5G14930	AT5G12340	AT3G47820
					AT5G15265	AT5G54860	AT3G48090
					AT5G15360	AT4G19925	AT3G48100
					AT5G15870	AT5G07820	AT3G48310
					AT5G16170	AT1G78120	AT3G48320
					AT5G17330	AT4G18430	AT3G48640
					AT5G17760	AT3G50060	AT3G48770
					AT5G18470	AT1G09415	AT3G48800
					AT5G19930	AT3G06300	AT3G48950
					AT5G20230	AT4G05380	AT3G49110
					AT5G20820	AT1G05630	AT3G49130
					AT5G20960	AT4G18870	AT3G49305
					AT5G21960	AT3G26600	AT3G49340
					AT5G22380	AT5G02220	AT3G49400
					AT5G22530	AT5G57130	AT3G50060
					AT5G22540	AT1G73650	AT3G50090
					AT5G22550	AT4G14540	AT3G50770
					AT5G22560	AT5G61440	AT3G50800
					AT5G22880	AT3G09260	AT3G50850
					AT5G22930	AT3G59310	AT3G50930
					AT5G23420	AT5G03610	AT3G51330
					AT5G23820	AT1G63220	AT3G51740
					AT5G23910	AT5G11000	AT3G51910
					AT5G24110	AT1G19380	AT3G51920
					AT5G24200	AT3G15640	AT3G52400
					AT5G24210	AT1G28370	AT3G52430
					AT5G24540	AT5G39670	AT3G52748
					AT5G24640	AT5G10210	AT3G53160
					AT5G25250	AT4G01390	AT3G53210
					AT5G25260	AT2G26240	AT3G53232
					AT5G25930	AT3G13090	AT3G53310
					AT5G26170	AT1G09070	AT3G53630
					AT5G26280	AT1G10700	AT3G54150
					AT5G26690	AT5G11970	AT3G54180
					AT5G27240	AT1G77360	AT3G54880
					AT5G27420	AT4G21865	AT3G55580
					AT5G33390	AT1G25220	AT3G55646
					AT5G36920	AT1G49050	AT3G55660
					AT5G36925	AT4G25070	AT3G55700
					AT5G36970	A_84_P751227	AT3G56130
					AT5G37485	AT2G15025	AT3G56160
					AT5G37660	AT1G68238	AT3G56500
					AT5G37740	TA52345_3702	AT3G56710
					AT5G38110	AT4G26070	AT3G56770
					AT5G38210	AT4G16960	AT3G56891
					AT5G38250	AT4G32720	AT3G57070
					AT5G38260	AT5G33390	AT3G57230
					AT5G38300	AT4G21070	AT3G57260
					AT5G38310	AT4G36030	AT3G57270
					AT5G38900	AT1G28110	AT3G57640
					AT5G39020	AT1G02120	AT3G57870
					AT5G39580	AT3G45730	AT3G57950
					AT5G39670	AT1G23090	AT3G58150
					AT5G39680	AT5G61740	AT3G58270
					AT5G40000	AT3G48320	AT3G59080
					AT5G40010	BP867701	AT3G59100
					AT5G40990	AT5G60930	AT3G59700
					AT5G41060	AT1G80110	AT3G60420
					AT5G41750	AT1G65250	AT3G61280
					AT5G42380	AT5G53370	AT3G61300
					AT5G42440	AT3G20395	AT3G61390
					AT5G42830	AT1G19210	AT3G61630
					AT5G42880	AT5G03160	AT3G61678
					AT5G43420	AT1G15800	AT3G62150
					AT5G43910	AT4G08770	AT3G63350
					AT5G44390	AT2G31870	AT3G66656
					AT5G44400	AT2G24570	AT4G00840
					AT5G44568	AT5G59820	AT4G00960
					AT5G44570	AT4G23810	AT4G01895
					AT5G44572	AT4G29270	AT4G01960
					AT5G44578	A_84_P760514	AT4G02110
					AT5G44585	AT1G21390	AT4G02200
					AT5G44820	AT3G56990	AT4G02330
					AT5G44990	AT1G05350	AT4G02390
					AT5G45000	AT2G39420	AT4G02410
					AT5G45470	AT2G36580	AT4G02440
					AT5G45480	AT5G59070	AT4G02520
					AT5G45510	AT3G15518	AT4G02550
					AT5G46050	AT1G34180	AT4G02910
					AT5G46295	AT1G51620	AT4G03450
					AT5G46350	TA25819_3702	AT4G04490
					AT5G46520	AT4G32860	AT4G04500
					AT5G47250	AT2G14620	AT4G04510
					AT5G47850	AT1G63530	AT4G04540
					AT5G48540	AT4G11840	AT4G04570
					AT5G48580	TC403911	AT4G04614
					AT5G48657	AT1G11100	AT4G04745
					AT5G48800	AT5G05340	AT4G05380
					AT5G48930	AT3G53260	AT4G05540
					AT5G50200	AT3G61390	AT4G07940
					AT5G50562	AT2G27310	AT4G08040
					AT5G50720	AT4G20110	AT4G08230
					AT5G51440	AT1G56423	AT4G08480
					AT5G51590	AT2G19800	AT4G08770
					AT5G51630	AT5G46520	AT4G08780
					AT5G52220	AT4G28390	AT4G09100
					AT5G52740	A_84_P860814	AT4G09770
					AT5G52750	TA30525_3702	AT4G10250
					AT5G52760	AT1G52140	AT4G10500
					AT5G53830	AT1G36675	AT4G10860
					AT5G53980	AT1G03400	AT4G10920
					AT5G54610	AT2G13800	AT4G11070
					AT5G54850	AT4G09780	AT4G11170
					AT5G55150	AT1G16640	AT4G11280
					AT5G55450	AT3G56770	AT4G11370
					AT5G55460	AT1G72330	AT4G11470
					AT5G55520	AT3G26760	AT4G11650
					AT5G55820	AT4G23700	AT4G11655
					AT5G56050	AT1G21240	AT4G11660
					AT5G56120	AT1G51850	AT4G11850
					AT5G56960	AT5G50200	AT4G11890
					AT5G56970	AT1G70470	AT4G12310
					AT5G57010	AT5G45470	AT4G12382
					AT5G57130	AT1G10990	AT4G12400
					AT5G57700	AT1G20700	AT4G12490
					AT5G59070	AT4G00240	AT4G12980
					AT5G59240	AT1G30410	AT4G13170
					AT5G59820	AT5G38850	AT4G13190
					AT5G59970	AT1G13340	AT4G13575
					AT5G60200	AT1G59620	AT4G13660
					AT5G60280	AT4G23320	AT4G13820
					AT5G60440	AT2G16595	AT4G13890
					AT5G60670	AT3G14060	AT4G14250
					AT5G60730	AT3G21900	AT4G14365
					AT5G60800	AT5G07610	AT4G14370
					AT5G60930	AT1G48145	AT4G14390
					AT5G60950	AT1G72000	AT4G14400
					AT5G60980	AT4G09130	AT4G14450
					AT5G61070	AT3G24830	AT4G15070
					AT5G61130	AT2G24180	AT4G15140
					AT5G61160	AT4G34412	AT4G15150
					AT5G61440	AT5G51590	AT4G15236
					AT5G61740	AT1G18630	AT4G15410
					AT5G61890	AT3G54180	AT4G15420
					AT5G62190	AT5G22630	AT4G15680
					AT5G62630	TA52206_3702	AT4G15975
					AT5G62710	AT3G09405	AT4G15990
					AT5G62820	AT2G28460	AT4G16820
					AT5G64000	BX838074	AT4G16970
					AT5G64100	AT3G11402	AT4G17070
					AT5G64110	AT2G20830	AT4G17250
					AT5G64120	AT1G77405	AT4G17490
					AT5G64401	AT4G35310	AT4G17905
					AT5G64810	AT1G63150	AT4G18170
					AT5G64870	AT2G01818	AT4G18250
					AT5G64890	AT5G42380	AT4G18540
					AT5G64905	AT2G25200	AT4G18590
					AT5G65360	AT5G19490	AT4G18870
					AT5G65420	AT4G14450	AT4G18880
					AT5G65440	AT3G50800	AT4G18890
					AT5G66000	AT5G61210	AT4G19130
					AT5G66130	AT5G12480	AT4G19350
					AT5G66390	AT5G22250	AT4G19410
					AT5G67340	AT5G19880	AT4G19515
					AV442348	AT1G16110	AT4G19800
					AY085891	AT5G61900	AT4G19880
					AY087114	AT1G25275	AT4G19925
					AY099820	AT4G25350	AT4G20000
					BE039144	AT2G32190	AT4G20780
					BP783345	AT5G36925	AT4G20830
					BP803304	AA605363	AT4G21070
					BP867701	AT3G28340	AT4G21320
					BX832756	AT5G54710	AT4G21660
					BX834828	AT1G29860	AT4G21700
					CB185540	AT3G14990	AT4G21840
					CD530924	AT1G15830	AT4G21850
					CD531672	AT1G28280	AT4G21903
					DQ108857	AT4G17905	AT4G22530
					DR339542	AT3G44480	AT4G23030
					EG479048	AT4G39580	AT4G23140
					ES444444	AT1G01190	AT4G23150
					EXLB3	AT1G12520	AT4G23160
					NP039098	AT2G36690	AT4G23170
					NP206666	TA42103_3702	AT4G23190
					NP221286	AT3G55660	AT4G23210
					NP226495	AT3G17010	AT4G23240
					NP227392	AT5G50720	AT4G23250
					NP230685	TA52085_3702	AT4G23270
					NP231108	AT3G55470	AT4G23290
					NP236409	AT5G01540	AT4G23300
					NP236532	AT1G76440	AT4G23310
					NP335312	AT5G39680	AT4G23320
					NP453103	AT1G21250	AT4G23493
					NP454661	AT1G73540	AT4G23515
					NP502509	AT1G33420	AT4G23530
					T42092	NP206666	AT4G23610
					TA25819_3702	AT5G18750	AT4G23760
					TA25979_3702	AT5G11140	AT4G23810
					TA26159_3702	AT5G03380	AT4G24020
					TA27368_3702	AT1G68940	AT4G24350
					TA27523_3702	AT1G18910	AT4G24860
					TA35714_3702	AT3G29000	AT4G25110
					TA42103_3702	AT4G29150	AT4G25200
					TA43931_3702	AT4G15410	AT4G25330
					TA44809_3702	AT2G32020	AT4G25340
					TA45631_3702	AT1G67000	AT4G25380
					TA48723_3702	AT4G19020	AT4G25490
					TA50489_3702	AT1G30740	AT4G25750
					TA52085_3702	AT1G67980	AT4G25810
					TA52122_3702	AT5G35735	AT4G26055
					TA52206_3702	AT4G09100	AT4G26120
					TC361187	AT5G10290	AT4G26230
					TC362032	AT4G22070	AT4G26990
					TC371401	TA26159_3702	AT4G27090
					TC374503	AT4G17250	AT4G27280
					TC389609	AT2G44370	AT4G27670
					TC397000	AT3G49620	AT4G27970
					TC397804	AT3G26680	AT4G28460
						AT1G66480	AT4G28703
						AT5G39020	AT4G29050
						AT2G19990	AT4G29430
						AT1G73805	AT4G29740
						AT3G26320	AT4G29760
						AT3G21140	AT4G29770
						TC362032	AT4G29980
						AT2G28830	AT4G30430
						AT1G66920	AT4G30640
						AT2G33580	AT4G31980
						AT5G60260	AT4G32040
						AT3G53160	AT4G32110
						AT5G22540	AT4G32208
						AT3G28899	AT4G32540
						AT5G44572	AT4G32720
						AT5G45000	AT4G32800
						AT2G36170	AT4G32860
						AT3G57630	AT4G33050
						AT4G15070	AT4G34390
						AT1G14480	AT4G34412
						AT1G22650	AT4G36030
						AT2G37060	AT4G36090
						AT1G35210	AT4G36430
						AT2G30490	AT4G36988
						AT5G04930	AT4G37290
						AT2G02230	AT4G37300
						AT1G34750	AT4G37370
						AT5G39720	AT4G37490
						AT4G09110	AT4G37610
						AT5G66000	AT4G37730
						AT2G17820	AT4G37780
						AT2G02350	AT4G38560
						AT2G34930	AT4G38630
						A_84_P789631	AT4G38940
						AT5G38300	AT4G39030
						AT3G22160	AT4G39070
						AT2G18000	AT4G39190
						AT5G45480	AT4G39260
						AT5G60440	AT4G39570
						TC387741	AT4G39580
						AT5G46295	AT4G39630
						AT3G49780	AT4G39670
						AT4G17720	AT4G39770
						AT4G17710	AT4G39830
						AT4G35110	AT4G39950
						AT3G57330	AT4G40020
						TA39078_3702	AT5G01250
						AT4G23030	AT5G01540
						AT2G37130	AT5G01560
						AT4G04695	AT5G01732
						AT2G32030	AT5G01900
						AT5G46510	AT5G02220
						AT1G29290	AT5G02490
						AT3G45390	AT5G02780
						A_84_P755889	AT5G03160
						EG522742	AT5G03340
						AT2G26010	AT5G03350
						AT3G50760	AT5G03390
						AT5G39110	AT5G03435
						AT5G52740	AT5G03610
						AT1G19020	AT5G03720
						AT3G46490	AT5G03990
						AT2G02010	AT5G04340
						AT2G19300	AT5G04930
						AT2G03505	AT5G05300
						AT2G44070	AT5G05340
						AT4G15417	AT5G05410
						NP221870	AT5G05790
						AT1G62422	AT5G05850
						AT1G02230	AT5G05860
						AT2G20720	AT5G05965
						AT4G11000	AT5G06450
						AT3G53180	AT5G06510
						AT2G02340	AT5G06720
						AT1G21570	AT5G06730
						AT5G62920	AT5G06740
						AT1G18382	AT5G06820
						AT4G33070	AT5G07610
						AT5G13710	AT5G07770
						NP235465	AT5G07810
						AT4G04490	AT5G07820
						AT5G08139	AT5G07850
						AT5G51440	AT5G08141
						TA45941_3702	AT5G08240
						AT4G26380	AT5G08335
						AT2G05380	AT5G09240
						AT2G05440	AT5G09290
						AT3G04800	AT5G09590
						AT3G02840	AT5G10210
						AT2G28940	AT5G10440
						AT3G27860	AT5G10695
						AT1G13100	AT5G10760
						AT1G23020	AT5G11000
						AT2G35000	AT5G11140
						AT3G43250	AT5G11210
						AT5G67410	AT5G11250
						AT5G15360	AT5G11410
						AT2G02020	AT5G11920
						AT1G79770	AT5G11970
						AT5G48657	AT5G12020
						AT1G02220	AT5G12030
						AT5G64100	AT5G12240
						AT5G10440	AT5G12410
						TA30956_3702	AT5G12480
						AT2G20562	AT5G13080
						AT4G37400	AT5G13090
						AT3G23900	AT5G13210
						AT3G21781	AT5G13320
						AT5G48540	AT5G13370
						AT2G41100	AT5G13640
						AT3G16030	AT5G13710
						AT1G56080	AT5G13825
						AT1G02580	AT5G13880
						AT4G04920	AT5G14240
						AT5G55150	AT5G14470
						AT1G51680	AT5G14490
						AT2G26130	AT5G14930
						AT3G46070	AT5G15350
						AT4G12010	AT5G15360
						AT3G45960	AT5G15870
						NP454069	AT5G16170
						AT3G45260	AT5G16740
						AT3G56891	AT5G17330
						AT3G56160	AT5G17760
						AT1G07000	AT5G18180
						AT1G17180	AT5G18300
						AT2G27470	AT5G18470
						AT2G45010	AT5G19650
						AT1G54850	AT5G19930
						AT5G10520	AT5G19960
						AT1G58245	AT5G20225
						AT5G21960	AT5G20230
						AT5G55490	AT5G20850
						AT5G17760	AT5G20960
						AT3G51680	AT5G21010
						AT2G35736	AT5G21960
						AT3G48100	AT5G22380
						AT2G27420	AT5G22530
						AT1G76480	AT5G22540
						AT4G11370	AT5G22550
						AT1G67970	AT5G22850
						AT4G01700	AT5G23040
						AT2G42350	AT5G23280
						AT1G07400	AT5G23380
						AT3G09350	AT5G23510
						AT2G05940	AT5G23680
						AT1G10920	AT5G24110
						AT4G08480	AT5G24200
						AT3G45640	AT5G24210
						AT3G05690	AT5G24540
						AT1G77130	AT5G24640
						AT3G57700	AT5G25250
						AT1G06820	AT5G25260
						AT5G41750	AT5G25425
						AT1G18310	AT5G25450
						AT1G03905	AT5G25910
						AT4G30060	AT5G25920
						AT1G78340	AT5G25930
							AT5G26170
							AT5G26630
							AT5G26690
							AT5G26920
							AT5G27420
							AT5G27720
							AT5G28010
							AT5G28070
							AT5G33390
							AT5G35320
							AT5G35450
							AT5G35698
							AT5G36290
							AT5G36920
							AT5G36925
							AT5G36970
							AT5G37230
							AT5G37270
							AT5G37485
							AT5G37660
							AT5G37670
							AT5G37740
							AT5G37820
							AT5G38210
							AT5G38240
							AT5G38250
							AT5G38260
							AT5G38300
							AT5G38310
							AT5G38900
							AT5G39020
							AT5G39580
							AT5G39670
							AT5G39680
							AT5G40000
							AT5G40010
							AT5G40170
							AT5G40990
							AT5G41550
							AT5G41680
							AT5G41750
							AT5G41761
							AT5G42330
							AT5G42380
							AT5G42440
							AT5G42830
							AT5G43420
							AT5G43450
							AT5G43460
							AT5G43910
							AT5G44390
							AT5G44568
							AT5G44570
							AT5G44572
							AT5G44575
							AT5G44582
							AT5G44585
							AT5G44820
							AT5G44990
							AT5G45000
							AT5G45470
							AT5G45480
							AT5G45630
							AT5G45775
							AT5G46040
							AT5G46050
							AT5G46080
							AT5G46295
							AT5G46350
							AT5G46520
							AT5G46670
							AT5G47070
							AT5G47580
							AT5G47830
							AT5G47850
							AT5G47910
							AT5G48380
							AT5G48540
							AT5G48570
							AT5G48580
							AT5G48657
							AT5G48930
							AT5G49448
							AT5G49680
							AT5G49690
							AT5G49760
							AT5G50200
							AT5G50720
							AT5G51060
							AT5G51390
							AT5G51440
							AT5G51460
							AT5G51590
							AT5G51830
							AT5G51845
							AT5G51920
							AT5G52720
							AT5G52740
							AT5G52750
							AT5G52760
							AT5G52820
							AT5G53400
							AT5G53900
							AT5G54165
							AT5G54550
							AT5G54850
							AT5G55132
							AT5G55150
							AT5G55450
							AT5G55460
							AT5G56030
							AT5G56050
							AT5G56080
							AT5G56670
							AT5G56960
							AT5G57010
							AT5G57130
							AT5G57220
							AT5G57480
							AT5G57510
							AT5G59070
							AT5G59190
							AT5G59230
							AT5G59540
							AT5G59720
							AT5G59820
							AT5G59850
							AT5G60250
							AT5G60280
							AT5G60440
							AT5G60800
							AT5G60930
							AT5G60950
							AT5G60980
							AT5G61070
							AT5G61260
							AT5G61440
							AT5G61560
							AT5G61740
							AT5G61890
							AT5G62020
							AT5G62070
							AT5G62130
							AT5G62390
							AT5G62440
							AT5G62480
							AT5G62620
							AT5G62630
							AT5G62930
							AT5G63930
							AT5G64000
							AT5G64100
							AT5G64110
							AT5G64120
							AT5G64401
							AT5G64420
							AT5G64510
							AT5G64660
							AT5G64810
							AT5G64870
							AT5G64890
							AT5G64905
							AT5G64950
							AT5G65030
							AT5G65440
							AT5G66000
							AT5G66320
							AT5G66390
							AT5G66550
							AT5G66640
							AT5G66660
							AT5G66675
							AT5G67340
							AT5G67620
							AY085891
							AY087114
							AY099820
							BE039144
							BETA-OHASE_2
							BP602732
							BP651126
							BP783345
							BP803304
							BP867701
							BU917423
							BX832756
							BX834828
							CB185540
							CB253682
							CD530924
							CD531672
							CP1
							DQ108714
							DR205022
							DR339542
							EF183205
							EG424432
							EG439403
							EG479048
							EG495424
							EG501568
							ES444444
							EXLB3
							H76854
							LOH2
							NP033471
							NP039098
							NP043472
							NP168025
							NP183931
							NP206666
							NP214380
							NP221627
							NP221653
							NP221927
							NP225641
							NP226495
							NP226538
							NP230685
							NP235466
							NP236409
							NP236996
							NP306163
							NP453103
							NP454661
							NP502509
							NP542284
							PDF5
							T13966
							TA25819_3702
							TA25881_3702
							TA25979_3702
							TA26159_3702
							TA27098_3702
							TA27368_3702
							TA28507_3702
							TA28705_3702
							TA29223_3702
							TA29494_3702
							TA29783_3702
							TA29937_3702
							TA31368_3702
							TA36920_3702
							TA41139_3702
							TA42103_3702
							TA43931_3702
							TA44112_3702
							TA44809_3702
							TA45631_3702
							TA47315_3702
							TA48723_3702
							TA49044_3702
							TA50489_3702
							TA51862_3702
							TA52085_3702
							TA52206_3702
							TC358207
							TC358953
							TC362032
							TC366156
							TC367209
							TC374503
							TC379423
							TC397804
							TC398054
							TC398910
							TC400366

## Sheet: down-expressed
Ei-2/Oy-0/Wt-1	Oy-0/Wt-1	Ei-2/Oy-0	Ei-2/Wt-1	Di-2/Ler-0/St-0	Di-2/Ler-0	Ler-0/St-0	Di-2/St-0
AT5G15240	AT1G01480	AT5G15240	A_84_P752319	AT1G12260	A_84_P750345	AT3G08510	A_84_P754320
	AT1G79900	AT1G21890	A_84_P754320	AT4G01440	A_84_P750861	AT3G47420	A_84_P756849
	AT3G16330		A_84_P765758	AT4G37980	A_84_P751396	AT2G35130	A_84_P757222
	AT3G46660		A_84_P769426	AT1G49660	A_84_P754320	NP231002	A_84_P758905
	AT4G02160		A_84_P803526	AT1G57770	A_84_P756221	AT5G10430	A_84_P760106
	AT4G25433		A_84_P839478	TA48802_3702	A_84_P758905	AT1G67440	A_84_P767356
	AT5G04370		AA650689	AT3G07020	A_84_P763448	AT1G23205	A_84_P798436
	AT5G13170		AT1G01110	AT1G60140	A_84_P766066	AT2G18890	A_84_P855128
	AT5G15240		AT1G01120	AT2G31560	A_84_P767243	AT5G13570	AA042562
	AT5G42510		AT1G01200	AT5G51890	A_84_P769549	AT2G46690	AK229202
			AT1G01250	AT2G45380	A_84_P770152	AT3G44070	AK229901
			AT1G01380	AT4G26080	A_84_P770193	AT1G60140	AK-HSDH_I
			AT1G01390	AT1G32450	A_84_P798436	AT4G32320	AT1G01070
			AT1G01620	AT4G15110	A_84_P800139	AT5G60100	AT1G01120
			AT1G01790	AT1G48750	A_84_P804353	AT1G51720	AT1G01250
			AT1G02640	AT1G01430	A_84_P839478	AT5G10690	AT1G01355
			AT1G02890	AT1G17940	A_84_P846758	AT2G04795	AT1G01380
			AT1G03740	AT3G61420	A_84_P846978	AT5G55550	AT1G01420
			AT1G04700	AT3G19170	A_84_P847021	AT2G17340	AT1G01430
			AT1G04820	AT4G38460	A_84_P855128	AT5G56520	AT1G01453
			AT1G05010	AT3G11660	AF418241	AT5G15900	AT1G01500
			AT1G05020	TA30280_3702	AK221330	AT5G02640	AT1G01580
			AT1G05420	TA28014_3702	AK221828	AT4G39210	AT1G02000
			AT1G06090	AT2G46660	AK229202	AT4G23430	AT1G02310
			AT1G06170	AT3G05937	AK229901	AT1G73170	AT1G02860
			AT1G06640	AT4G21550	AK-HSDH_I	AT1G29400	AT1G03103
			AT1G07120	AT1G78140	ARA1	TA43742_3702	AT1G03200
			AT1G07230	AT2G46370	AT1G01120	AT5G61720	AT1G03495
			AT1G07570	AT3G21600	AT1G01355	AT3G63280	AT1G03890
			AT1G07710	AT5G51810	AT1G01420	AT1G76800	AT1G03970
			AT1G08160	AT2G45245	AT1G01430	AT3G21260	AT1G04580
			AT1G08340	AT3G63330	AT1G01453	AT4G29490	AT1G05280
			AT1G09000	AT1G17830	AT1G01540	AT1G55760	AT1G05310
			AT1G09960	AT2G41225	AT1G01750	AT4G15765	AT1G05340
			AT1G10560	AT1G28335	AT1G02000	AT4G36240	AT1G05510
			AT1G11350	AT5G65200	AT1G02040	AT4G21550	AT1G06090
			AT1G11545	AT2G26692	AT1G02070	AT1G57770	AT1G06430
			AT1G12080	AT1G07720	AT1G02300	AT5G48560	AT1G06780
			AT1G14390	AT1G05310	AT1G02305	AT2G26692	AT1G07120
			AT1G15350	AT5G11110	AT1G02470	AT5G50950	AT1G07230
			AT1G16490	AT4G22990	AT1G02500	AT5G59350	AT1G07540
			AT1G16850	AT3G48520	AT1G02560	AT3G11150	AT1G07720
			AT1G16960	AT2G39850	AT1G02860	AT3G58710	AT1G08310
			AT1G17255	AT3G58470	AT1G02900	AT5G58310	AT1G08430
			AT1G18060	BX821260	AT1G03310	AT3G14720	AT1G08440
			AT1G18350	AT5G08500	AT1G03495	TA52495_3702	AT1G08770
			AT1G18710	AT4G19700	AT1G03940	TA43531_3702	AT1G09155
			AT1G18870	AT5G20790	AT1G04420	AT3G21100	AT1G09240
			AT1G19510	AT1G56280	AT1G04440	AT5G50940	AT1G09350
			AT1G19630	AT3G22830	AT1G04500	AT4G18220	AT1G09380
			AT1G19670	AT5G56520	AT1G04710	AT1G45249	AT1G10090
			AT1G20840	AT4G24430	AT1G05310	AT5G62720	AT1G10600
			AT1G20850	AT2G41970	AT1G05420	AT5G43610	AT1G11170
			AT1G21830	AT3G10525	AT1G05560	AT3G06483	AT1G11190
			AT1G22330	AT1G50020	AT1G05790	AT2G27990	AT1G11210
			AT1G22340	AT2G46870	AT1G05940	AT5G10625	AT1G11700
			AT1G22360	AT2G27550	AT1G06090	AT4G33150	AT1G12064
			AT1G22830	AT5G18475	AT1G06430	AT3G01980	AT1G12260
			AT1G23060	AT5G57940	AT1G06460	AT3G59052	AT1G12450
			AT1G23090	AT5G66040	AT1G06640	AT2G36340	AT1G13960
			AT1G23530	AT3G21250	AT1G06780	AT1G28305	AT1G13970
			AT1G24070	AT5G44190	AT1G07040	AT5G46180	AT1G14780
			AT1G24735	AK229202	AT1G07120	AT4G36000	AT1G14950
			AT1G25230	AT4G30540	AT1G07230	AT1G71480	AT1G15165
			AT1G25240	AT5G40640	AT1G07710	AT5G58360	AT1G15310
			AT1G25250	AT4G18270	AT1G07720	AT1G62030	AT1G15350
			AT1G26570	AT2G47270	AT1G08030	AT4G29670	AT1G15550
			AT1G26945	AT1G45616	AT1G08200	AT2G31750	AT1G15825
			AT1G27130	AT5G04950	AT1G08310	AT2G28470	AT1G15960
			AT1G27920	AT5G57800	AT1G08440	TA28635_3702	AT1G16120
			AT1G28390	AT4G13450	AT1G09240	AT4G01940	AT1G16850
			AT1G28470	AT3G19620	AT1G09350	AT1G72140	AT1G17020
			AT1G29050	AT4G26150	AT1G09440	AT1G01430	AT1G17710
			AT1G29200	AT2G32540	AT1G10070	AT5G48700	AT1G17810
			AT1G29420	AT3G02500	AT1G10090	AT4G18380	AT1G17830
			AT1G29450	AT5G40960	AT1G10500	AT1G53830	AT1G17940
			AT1G29520	AT3G62550	AT1G10760	AT1G07120	AT1G18100
			AT1G30760	AT5G61720	AT1G11190	AK-HSDH_I	AT1G18870
			AT1G31070	AT2G47670	AT1G11210	AT5G07410	AT1G18880
			AT1G31770	AT5G60360	AT1G11540	AT5G40640	AT1G19780
			AT1G32100	AT4G20840	AT1G11580	AT1G49660	AT1G20160
			AT1G32640	AT3G09910	AT1G11700	AT4G21870	AT1G20500
			AT1G32900	AT1G01355	AT1G12050	AT5G25130	AT1G21680
			AT1G33430	AT4G39210	AT1G12110	AT3G11660	AT1G21790
			AT1G33590	AT1G51720	AT1G12150	AT5G02170	AT1G21920
			AT1G34040	AT5G25130	AT1G12240	AT3G15020	AT1G22370
			AT1G36732	AT4G25860	AT1G12250	AT2G41475	AT1G22570
			AT1G41830	AT1G73880	AT1G12260	AT4G36010	AT1G22990
			AT1G44830	AT2G46680	AT1G12640	AT2G17150	AT1G23040
			AT1G45191	AT2G03800	AT1G13600	AT3G04550	AT1G23200
			AT1G45201	AT4G29670	AT1G14150	AT5G06710	AT1G23201
			AT1G47670	AT1G50290	AT1G14390	AT4G33790	AT1G23800
			AT1G50010	A_84_P758905	AT1G14780	AT2G42835	AT1G24330
			AT1G51440	AT5G24870	AT1G15350	AT3G22020	AT1G24650
			AT1G52030	AT4G27250	AT1G15550	AT4G37420	AT1G25250
			AT1G52040	AT1G33270	AT1G15670	AT5G42580	AT1G25530
			AT1G52190	AT5G42800	AT1G15980	AA650689	AT1G26560
			AT1G52400	AT2G01200	AT1G16400	AT3G63330	AT1G26570
			AT1G52410	AT1G69600	AT1G16720	AT5G18475	AT1G26820
			AT1G52910	AT3G62700	AT1G16820	AT1G29390	AT1G26920
			AT1G53700	AT5G63800	AT1G16850	AT5G48880	AT1G27200
			AT1G53830	AT3G06483	AT1G16880	AT3G09540	AT1G27461
			AT1G54095	AT2G32795	AT1G16960	AT3G01250	AT1G27760
			AT1G55180	AT1G09240	AT1G17020	AT1G79520	AT1G27910
			AT1G55760	AT3G51870	AT1G17030	AT3G18362	AT1G27990
			AT1G56650	AT4G34600	AT1G17310	AT3G19900	AT1G28335
			AT1G56720	AT3G10970	AT1G17744	AT1G72130	AT1G28590
			AT1G58070	AT1G72470	AT1G17830	AT3G03430	AT1G29050
			AT1G58440	AT3G56630	AT1G17940	AT5G54250	AT1G29680
			AT1G59218	AT4G11960	AT1G17950	TA30280_3702	AT1G30500
			AT1G59940	AT1G64130	AT1G17980	TA53296_3702	AT1G30860
			AT1G61360	AT1G80050	AT1G18010	AT4G15920	AT1G31050
			AT1G61380	AT1G31820	AT1G18075	AT5G41920	AT1G31790
			AT1G61760	AT1G78450	AT1G18290	AT1G31790	AT1G31820
			AT1G62990	AT3G15890	AT1G18710	AT5G60600	AT1G32100
			AT1G63300	DQ108839	AT1G18870	AT5G43780	AT1G32450
			AT1G64142	AT5G13730	AT1G18880	AT5G60720	AT1G32560
			AT1G64200	AT4G38810	AT1G19150	AT2G01300	AT1G33270
			AT1G64300	AT3G23410	AT1G19170	AT5G13730	AT1G33700
			AT1G64370	A_84_P754320	AT1G19570	AT3G59940	AT1G35720
			AT1G64400	AT2G22990	AT1G19660	AT4G16750	AT1G42470
			AT1G64640	AT1G79160	AT1G19900	AT1G70830	AT1G43890
			AT1G64710	AT4G31420	AT1G20160	AT5G19530	AT1G45249
			AT1G65390	AT4G30470	AT1G20800	AT1G49470	AT1G45616
			AT1G65480	AT1G11210	AT1G21065	AT1G20470	AT1G46554
			AT1G65590	AT2G28200	AT1G21400	AT5G43850	AT1G46768
			AT1G65840	AT2G29370	AT1G21410	AT1G01453	AT1G47540
			AT1G66020	AT1G75360	AT1G21640	AT5G40380	AT1G48000
			AT1G66350	AT1G73170	AT1G21920	AT3G54390	AT1G48130
			AT1G66370	AT3G01980	AT1G22130	AT1G62360	AT1G48470
			AT1G66810	AT2G19650	AT1G22150	AT3G27170	AT1G48500
			AT1G67870	AT2G21590	AT1G22480	AT5G11840	AT1G48750
			AT1G68330	AT1G76800	AT1G22570	AT1G70880	AT1G48990
			AT1G68500	AT4G10310	AT1G22850	AT4G31990	AT1G49450
			AT1G68600	AT5G23050	AT1G22990	TA51152_3702	AT1G49640
			AT1G68810	AT4G27520	AT1G23060	AT1G10090	AT1G49660
			AT1G69080	AT4G16190	AT1G23110	AT5G04460	AT1G50020
			AT1G69230	AT1G46554	AT1G23740	AT5G42270	AT1G50290
			AT1G69870	AT3G19900	AT1G23800	AT2G42600	AT1G50590
			AT1G70270	AT4G37140	AT1G24330	AT1G59510	AT1G50630
			AT1G70750	TA31749_3702	AT1G24625	AT4G31420	AT1G51030
			AT1G70830	TA52555_3702	AT1G25250	AT5G58400	AT1G51090
			AT1G70850	AT2G45750	AT1G25270	AT2G42410	AT1G51140
			AT1G70880	AT4G15490	AT1G25310	AT1G18880	AT1G51260
			AT1G70890	AT4G32190	AT1G25530	AT1G75360	AT1G51440
			AT1G71870	AT1G72140	AT1G26560	AT1G78450	AT1G51720
			AT1G72140	AT5G40850	AT1G26720	AT1G21830	AT1G52080
			AT1G72230	AT4G30830	AT1G26820	AT1G24330	AT1G52590
			AT1G72416	TA26074_3702	AT1G26920	AT2G44850	AT1G52690
			AT1G73140	AT1G06090	AT1G27110	AT2G38610	AT1G52880
			AT1G73330	AT1G31790	AT1G27200	AT5G50040	AT1G53210
			AT1G74420	AT3G61450	AT1G27210	AT1G68600	AT1G53580
			AT1G74650	AT4G33150	AT1G27280	AT5G23050	AT1G53870
			AT1G74810	AT2G22900	AT1G27440	AT1G69100	AT1G54100
			AT1G75250	AT3G61220	AT1G27770	AT4G22570	AT1G54570
			AT1G75260	AT3G07940	AT1G27910	AT3G21360	AT1G54575
			AT1G75280	AT1G49640	AT1G28335	AT2G41700	AT1G54790
			AT1G75300	AT4G18740	AT1G28430	AT1G79160	AT1G54860
			AT1G75450	AT4G21570	AT1G28610	AT4G30470	AT1G55760
			AT1G75680	AT2G24762	AT1G29200	AT1G53480	AT1G56280
			AT1G75820	AT2G43700	AT1G29395	AT1G08310	AT1G57590
			AT1G76610	AT5G37500	AT1G29440	AT3G49580	AT1G57770
			AT1G76680	AT3G02910	AT1G29450	AT5G67245	AT1G58270
			AT1G77450	AT1G67710	AT1G29460	AT2G35210	AT1G58360
			AT1G77490	AT5G50915	AT1G29952	AT1G71710	AT1G58520
			AT1G77520	AT2G42280	AT1G30510	AT1G68570	AT1G60140
			AT1G77670	AT1G25250	AT1G30515	AT1G33240	AT1G61740
			AT1G78080	AT5G28300	AT1G30760	AT2G18170	AT1G61810
			AT1G78265	AT1G06430	AT1G31173	AT3G10525	AT1G62000
			AT1G78450	AT4G18070	AT1G31190	AT5G24860	AT1G62060
			AT1G78680	AT1G45249	AT1G31670	AT4G32250	AT1G62070
			AT1G78850	AT1G02000	AT1G31720	AT3G55290	AT1G62080
			AT1G78940	AT5G58360	AT1G31790	AT1G53180	AT1G62210
			AT1G78970	AT1G73602	AT1G31820	AT3G53950	AT1G62220
			AT1G79310	AT1G80130	AT1G32100	AT1G48750	AT1G62225
			AT1G79620	AT4G01593	AT1G32160	TA30478_3702	AT1G62290
			AT1G80240	AT1G67370	AT1G32450	AT4G23990	AT1G62333
			AT1G80760	AK-HSDH_I	AT1G32740	AT5G65609	AT1G62370
			AT1G80840	AT1G75380	AT1G32770	AT5G42800	AT1G62510
			AT2G01340	AT3G28007	AT1G33270	AT3G13672	AT1G62620
			AT2G01450	AT2G42540	AT1G33800	AT1G55770	AT1G62710
			AT2G04780	AV813724	AT1G34340	AT1G22160	AT1G63010
			AT2G06850	AT5G54585	AT1G35720	AT1G50290	AT1G63300
			AT2G10940	AT3G08510	AT1G44750	AT4G10310	AT1G64110
			AT2G15680	AT3G20640	AT1G44790	TA27151_3702	AT1G64130
			AT2G16750	AT1G69230	AT1G45010	A_84_P182034	AT1G65390
			AT2G16910	TA27151_3702	AT1G45249	TC359290	AT1G65480
			AT2G16990	AT4G39730	AT1G45616	AT5G16990	AT1G65840
			AT2G17650	AT2G46690	AT1G46554	AT3G56630	AT1G66020
			AT2G19900	AT4G32350	AT1G46768	AT4G31730	AT1G66390
			AT2G19930	AT2G27990	AT1G47128	AT4G23560	AT1G66460
			AT2G21140	AT5G04900	AT1G48000	AT3G24360	AT1G67370
			AT2G21540	AT5G55180	AT1G48420	AT3G52900	AT1G67710
			AT2G22190	AT5G04460	AT1G48450	AT1G18170	AT1G68250
			AT2G22900	AT5G42580	AT1G48500	AT4G18740	AT1G68500
			AT2G23000	AT2G44850	AT1G48590	AT2G46870	AT1G68600
			AT2G24610	AT3G24360	AT1G48750	AT1G20850	AT1G69230
			AT2G25600	AT4G16750	AT1G49230	AT4G24010	AT1G69600
			AT2G25820	AT4G09965	AT1G49640	AT1G65840	AT1G69870
			AT2G26690	AT5G61590	AT1G49660	AT1G61740	AT1G70230
			AT2G27740	AT2G41475	AT1G49740	AT2G32870	AT1G70640
			AT2G28315	AT1G10090	AT1G50020	AT4G27900	AT1G70680
			AT2G28470	AT1G55760	AT1G50290	AT1G27910	AT1G71120
			AT2G28580	AT5G17520	AT1G50450	AT3G62910	AT1G72130
			AT2G28840	AT4G15563	AT1G50630	AT5G04900	AT1G72140
			AT2G28930	AT5G65990	AT1G51090	AT4G09740	AT1G72200
			AT2G29130	AT4G12350	AT1G51110	AT4G09965	AT1G72360
			AT2G29630	AT1G75370	AT1G51140	AT5G01930	AT1G72470
			AT2G29710	AT3G04910	AT1G51440	AT2G34200	AT1G73040
			AT2G29720	AT5G46830	AT1G51550	AT5G59320	AT1G73170
			AT2G29890	AT1G02860	AT1G51720	AT1G51090	AT1G73190
			AT2G29980	AT2G39920	AT1G51805	AT1G02205	AT1G73220
			AT2G30740	AT5G67245	AT1G52000	TA48802_3702	AT1G73290
			AT2G30830	AT1G52590	AT1G52080	AT1G55370	AT1G73602
			AT2G31900	AT1G63010	AT1G52590	AT3G63160	AT1G73680
			AT2G32510	AT2G45720	AT1G52700	AT1G07280	AT1G73750
			AT2G32860	AT3G14810	AT1G52880	AT1G76990	AT1G73880
			AT2G32880	TC372325	AT1G53210	AT4G27520	AT1G74020
			AT2G32990	AT1G78270	AT1G53290	AT5G16600	AT1G75360
			AT2G33570	AT5G37730	AT1G53580	AT2G38890	AT1G75370
			AT2G33600	AT4G14819	AT1G53870	AT1G10910	AT1G75380
			AT2G34360	AT2G18860	AT1G54095	AT1G72200	AT1G75620
			AT2G34490	AT1G23800	AT1G54100	AT1G12260	AT1G76580
			AT2G34540	AT3G54020	AT1G54350	AT3G21570	AT1G76650
			AT2G34930	AT1G27910	AT1G54570	AT1G72110	AT1G76705
			AT2G35760	AT4G31990	AT1G54575	AT3G12160	AT1G76800
			AT2G35860	AT1G09350	AT1G54790	AT1G54790	AT1G76820
			AT2G36307	AT1G18880	AT1G55020	AT2G34080	AT1G77450
			AT2G36490	AT3G55290	AT1G55120	AT1G49210	AT1G77530
			AT2G37610	AT2G34080	AT1G55280	AT1G16320	AT1G78070
			AT2G37900	AT2G40470	AT1G55570	AT5G55250	AT1G78140
			AT2G38010	AT3G23590	AT1G55760	AT3G61890	AT1G78270
			AT2G38080	AT3G19390	AT1G55960	NP221616	AT1G78450
			AT2G38152	AT5G25280	AT1G56190	AT1G49200	AT1G78670
			AT2G38290	AT1G62370	AT1G56280	AT1G31170	AT1G79130
			AT2G38320	AT4G32250	AT1G56500	AT2G46660	AT1G79160
			AT2G38750	AT2G39800	AT1G56650	AT2G43180	AT1G79270
			AT2G38760	AT2G22970	AT1G57590	AT2G31280	AT1G79330
			AT2G39330	TA28772_3702	AT1G57770	AT5G44210	AT1G79520
			AT2G39400	AT5G57040	AT1G58270	AT3G47600	AT1G79840
			AT2G39435	AT1G68500	AT1G58520	AT2G45245	AT1G79900
			AT2G39850	AT1G79130	AT1G59730	AT2G01200	AT1G80050
			AT2G40470	AT2G38890	AT1G60140	AT3G21250	AT1G80090
			AT2G40530	AT1G52080	AT1G60505	AT5G24770	AT1G80130
			AT2G40610	TC400087	AT1G61050	AT5G57040	AT2G01200
			AT2G41300	AT1G53210	AT1G61740	AT1G52565	AT2G01580
			AT2G41540	AT3G14560	AT1G61795	AT2G22900	AT2G01770
			AT2G41610	AT5G25610	AT1G61810	AT4G27030	AT2G01880
			AT2G41880	AT3G14280	AT1G62370	AT5G39610	AT2G01890
			AT2G42760	AT5G58310	AT1G62510	AT3G03480	AT2G02080
			AT2G42870	AT1G24330	AT1G62660	AT4G01593	AT2G02120
			AT2G43010	AT5G58650	AT1G62800	AT2G22990	AT2G02580
			AT2G43920	AT4G32320	AT1G62975	AT4G14819	AT2G03710
			AT2G44930	AT5G53486	AT1G62990	AT1G78270	AT2G03800
			AT2G45400	AT2G33350	AT1G63010	AT3G27025	AT2G04025
			AT2G45470	AT2G34070	AT1G63030	AT3G09922	AT2G05580
			AT2G45610	AT3G51750	AT1G63970	AT5G58690	AT2G05910
			AT2G45685	AT3G20100	AT1G64130	AT5G05430	AT2G07140
			AT2G45900	TA28635_3702	AT1G65113	AT1G01355	AT2G11810
			AT2G46300	AT1G54100	AT1G65480	AT5G53730	AT2G16660
			AT2G46570	AT1G22990	AT1G65840	AT5G15030	AT2G16890
			AT2G46760	AT5G42270	AT1G65880	AT5G49620	AT2G16990
			AT2G46970	AT2G02080	AT1G66020	AT4G37800	AT2G17280
			AT2G46990	AT5G58690	AT1G66350	AT2G41225	AT2G18340
			AT2G47240	AT5G19530	AT1G66390	AT4G14870	AT2G18860
			AT2G47360	NP332587	AT1G67370	AT5G27930	AT2G19650
			AT2G47500	AT1G66020	AT1G67710	AT4G22990	AT2G19900
			AT2G47880	AT5G24770	AT1G68500	AT3G02500	AT2G20430
			AT3G01670	AT3G12520	AT1G68600	AK228879	AT2G20770
			AT3G01680	AT3G10340	AT1G68610	AT1G54100	AT2G21260
			AT3G01940	AT4G18280	AT1G68660	AT1G08500	AT2G21490
			AT3G01960	AT1G27200	AT1G69230	AV815458	AT2G21590
			AT3G02370	AT5G62720	AT1G69523	AT1G74020	AT2G22590
			AT3G02410	AT5G40380	AT1G69530	AT3G09250	AT2G22900
			AT3G03000	AT4G19170	AT1G69600	AT5G61350	AT2G22970
			AT3G03200	AT5G60600	AT1G70160	AT2G39980	AT2G22990
			AT3G03480	AT1G61740	AT1G70230	AT1G63060	AT2G23190
			AT3G03680	AT5G51680	AT1G70450	AT2G27830	AT2G23220
			AT3G03910	AT4G19390	AT1G70670	AT1G54575	AT2G23340
			AT3G05200	AT1G58520	AT1G70680	AT5G37360	AT2G23570
			AT3G06770	AT1G32100	AT1G70890	NP231112	AT2G23580
			AT3G07010	AT4G32940	AT1G70900	AT1G78140	AT2G23590
			AT3G09540	AT2G30230	AT1G70980	AT3G50440	AT2G23760
			AT3G09550	AT3G17180	AT1G71030	AT2G03310	AT2G24762
			AT3G10280	AT1G46768	AT1G71050	AT5G48890	AT2G25540
			AT3G11040	AT5G05110	AT1G71680	AT2G46680	AT2G25600
			AT3G11420	AK229901	AT1G71910	AT2G45750	AT2G25940
			AT3G12110	AT2G23760	AT1G72130	AT3G07020	AT2G25964
			AT3G12710	AT3G27820	AT1G72140	A_84_P758905	AT2G26690
			AT3G13220	AT5G18980	AT1G72200	AT1G50480	AT2G26692
			AT3G14170	NP231112	AT1G72470	AT2G46370	AT2G27190
			AT3G14370	AT4G23430	AT1G73040	AT3G05390	AT2G27380
			AT3G14720	AT5G01520	AT1G73170	AT3G20900	AT2G27505
			AT3G14840	AT5G24860	AT1G73330	AT4G32350	AT2G27550
			AT3G15356	AT5G23870	AT1G73602	AT4G09900	AT2G27940
			AT3G15520	AT3G53300	AT1G73640	AT2G29090	AT2G27990
			AT3G16240	AT5G23950	AT1G73880	AT5G11060	AT2G28120
			AT3G16350	FMO_GS-OX2	AT1G74020	AT3G63520	AT2G28200
			AT3G16360	AT5G50100	AT1G74090	AT1G72470	AT2G28470
			AT3G16470	AT1G35720	AT1G74300	AT5G60910	AT2G28490
			AT3G16530	AT2G47910	AT1G74430	AT5G51680	AT2G28930
			AT3G16690	A_84_P798436	AT1G74670	AT4G23060	AT2G29370
			AT3G16800	AT5G20280	AT1G74890	AT5G20280	AT2G29750
			AT3G17360	AT5G15900	AT1G75000	AT3G50340	AT2G30230
			AT3G17675	AT2G32870	AT1G75210	AT5G19740	AT2G30300
			AT3G17730	AT5G50950	AT1G75280	AT5G50100	AT2G31560
			AT3G18370	AT1G51140	AT1G75300	AT4G34600	AT2G32470
			AT3G18660	AT1G11700	AT1G75360	AT5G56760	AT2G32530
			AT3G18670	AT3G25870	AT1G75370	AT1G19630	AT2G32540
			AT3G18890	AT3G47510	AT1G75380	TC400087	AT2G32610
			AT3G19620	AT5G59320	AT1G75620	AT1G69600	AT2G32795
			AT3G20200	AT1G06780	AT1G76020	AT1G06780	AT2G32870
			AT3G20410	AT1G21920	AT1G76240	AT2G40470	AT2G33060
			AT3G20490	AT4G37420	AT1G76570	AT1G79970	AT2G33280
			AT3G20570	AT3G21670	AT1G76690	AT1G49320	AT2G33350
			AT3G21210	AT5G46180	AT1G76730	AT3G55710	AT2G33520
			AT3G21550	AT1G51440	AT1G76800	AT1G21890	AT2G34070
			AT3G21630	AT4G25433	AT1G77330	AT5G25350	AT2G34080
			AT3G21680	AT3G04530	AT1G77420	AT1G35720	AT2G34360
			AT3G22400	AT1G15350	AT1G77920	AT2G27190	AT2G34700
			AT3G22415	TA37316_3702	AT1G77930	AT4G27250	AT2G34790
			AT3G23090	AT2G28930	AT1G78100	AT4G25990	AT2G34850
			AT3G23550	AT5G50940	AT1G78140	AT2G39890	AT2G35060
			AT3G24715	AT1G65480	AT1G78230	AT3G53370	AT2G35210
			AT3G25572	AT2G01890	AT1G78270	AT3G61220	AT2G35300
			AT3G26670	AT5G54960	AT1G78450	AT3G48990	AT2G35550
			AT3G27030	AT3G47420	AT1G78490	AT5G62100	AT2G35585
			AT3G28860	AT3G50340	AT1G78670	AT5G07220	AT2G35710
			AT3G30580	AT1G62510	AT1G78680	AT1G01610	AT2G36090
			AT3G43960	TA30874_3702	AT1G78750	AT1G17020	AT2G36540
			AT3G44550	AT2G17280	AT1G78970	AT5G27320	AT2G36710
			AT3G44730	AT1G50630	AT1G79130	AT2G39850	AT2G37670
			AT3G45160	AT3G50440	AT1G79160	TA52555_3702	AT2G37870
			AT3G46110	AT3G03170	AT1G79420	NP332587	AT2G38240
			AT3G46490	AT3G50840	AT1G79520	AT2G32860	AT2G38400
			AT3G47960	AT5G50800	AT1G79600	AT4G19170	AT2G38465
			AT3G48260	AT1G72130	AT1G79610	AT5G59080	AT2G38890
			AT3G48420	AT5G25350	AT1G79900	AT3G04260	AT2G38920
			AT3G48460	AT2G26690	AT1G80050	AT4G22680	AT2G38940
			AT3G48970	AT1G79520	AT1G80130	AT4G37510	AT2G39050
			AT3G49330	AT3G48990	AT1G80170	AT1G77885	AT2G39435
			AT3G50350	AT5G10946	AT1G80240	AT4G18070	AT2G39800
			AT3G51220	AT1G26920	AT1G80310	AT2G19650	AT2G39850
			AT3G51300	AT5G43180	AT2G01200	AT1G58520	AT2G39920
			AT3G51400	AT5G65470	AT2G01450	AT1G22570	AT2G39980
			AT3G52130	AT2G32530	AT2G01890	AT3G18870	AT2G40435
			AT3G52370	AT1G08440	AT2G02080	AT2G45560	AT2G40470
			AT3G52490	AT5G21020	AT2G03200	AT4G21570	AT2G41040
			AT3G52900	AT4G22240	AT2G03360	AT1G06430	AT2G41190
			AT3G53100	AT2G25964	AT2G03710	AT1G13890	AT2G41225
			AT3G53290	AT3G55610	AT2G03800	AT4G11960	AT2G41475
			AT3G54630	AT2G35210	AT2G04025	AT3G10970	AT2G41480
			AT3G54650	AT1G14780	AT2G04038	AT3G47510	AT2G41870
			AT3G55130	AT3G61890	AT2G04100	AT3G48530	AT2G41970
			AT3G55410	AT4G23560	AT2G04160	A_84_P855128	AT2G42280
			AT3G55420	AT1G01120	AT2G07830	AT3G16170	AT2G42540
			AT3G55940	AT1G26560	AT2G11810	AT3G27340	AT2G43120
			AT3G56060	A_84_P855128	AT2G12200	AT5G17860	AT2G43580
			AT3G56200	AT4G09740	AT2G13680	AT3G21550	AT2G43670
			AT3G57760	AT5G19870	AT2G13810	AT1G64130	AT2G43700
			AT3G58470	AT4G23600	AT2G14095	AT1G53580	AT2G44850
			AT3G58720	AT5G25810	AT2G15310	AT1G55180	AT2G44990
			AT3G58850	AT3G63520	AT2G15318	AT5G22355	AT2G45210
			AT3G59570	AT5G56160	AT2G15830	AT3G51895	AT2G45245
			AT3G59830	AT4G23060	AT2G16740	AT2G11810	AT2G45380
			AT3G61080	AT1G54790	AT2G17260	AT2G20920	AT2G45720
			AT3G61210	AT5G11840	AT2G17280	AT5G08500	AT2G45750
			AT3G61680	AT3G10740	AT2G17695	AT1G75730	AT2G46210
			AT3G61760	TA46300_3702	AT2G17840	AT2G32795	AT2G46370
			AT3G62020	AT3G19150	AT2G18570	AT2G43700	AT2G46660
			AT3G62160	AT4G08290	AT2G18860	AT1G66390	AT2G46680
			AT3G62960	AT4G36060	AT2G19220	AT4G01440	AT2G46690
			AT3G63470	AT1G73040	AT2G19650	AT5G56160	AT2G46870
			AT4G00220	AT5G39610	AT2G19780	AT5G46830	AT2G46950
			AT4G00230	AT3G59580	AT2G20030	AT1G01120	AT2G47270
			AT4G00970	AT5G03190	AT2G20610	A_84_P750319	AT2G47670
			AT4G01150	AT5G43780	AT2G21187	AT1G79130	AT2G47770
			AT4G01250	AT1G20160	AT2G21590	AT2G18860	AT2G47780
			AT4G03175	AT2G28470	AT2G21880	AT1G80130	AT2G47910
			AT4G04840	AT1G74020	AT2G22900	AT2G01570	AT3G01570
			AT4G05110	TA51152_3702	AT2G22930	AT1G11190	AT3G01980
			AT4G05120	NP221616	AT2G22970	AT2G46760	AT3G02500
			AT4G05220	AT2G35060	AT2G22990	AT2G26355	AT3G02590
			AT4G05430	AT1G61810	AT2G23000	AT1G21460	AT3G02910
			AT4G07960	AT5G25240	AT2G23060	BP867645	AT3G03170
			AT4G08160	AT4G18220	AT2G23360	AT3G01472	AT3G03341
			AT4G09020	AT3G51895	AT2G23760	AT5G07580	AT3G03480
			AT4G09160	AT1G65840	AT2G23790	AT2G26250	AT3G03530
			AT4G09990	AT1G07120	AT2G23840	AT4G38460	AT3G03776
			AT4G10020	AT5G05020	AT2G24270	AT4G25860	AT3G04420
			AT4G10310	AT3G20300	AT2G24762	AT1G33480	AT3G04530
			AT4G10770	AT3G13672	AT2G25450	AT5G15510	AT3G04910
			AT4G11211	AT1G54570	AT2G25625	AT2G28930	AT3G05140
			AT4G12420	AT5G17860	AT2G25680	AT2G20180	AT3G05160
			AT4G12510	AT5G15500	AT2G25964	AT5G65200	AT3G05165
			AT4G12730	AT3G21550	AT2G26310	AT3G15890	AT3G05190
			AT4G13370	AT5G56760	AT2G26690	AT2G19010	AT3G05390
			AT4G14080	AT2G39980	AT2G26692	AT5G58700	AT3G05400
			AT4G14090	AT3G05165	AT2G27190	AT2G32610	AT3G05660
			AT4G14650	AT1G70230	AT2G27220	AT1G20160	AT3G05937
			AT4G14680	AT2G41870	AT2G27250	AT2G33350	AT3G06483
			AT4G14700	AT2G27190	AT2G27350	AT3G19170	AT3G07020
			AT4G14940	AT2G36710	AT2G27550	AT5G05600	AT3G07830
			AT4G15200	AT1G51090	AT2G27990	AT4G22240	AT3G07940
			AT4G15300	AT1G66390	AT2G28200	AT2G34070	AT3G08040
			AT4G15460	AT5G02170	AT2G28250	AT5G61590	AT3G08510
			AT4G15550	AT3G59052	AT2G28315	BX821260	AT3G08860
			AT4G15765	AT3G23790	AT2G28470	AT2G03800	AT3G09910
			AT4G15960	AT1G48000	AT2G28550	AT2G27550	AT3G09922
			AT4G16750	AT4G24000	AT2G28800	AT1G17940	AT3G10340
			AT4G17030	AT3G11150	AT2G28930	AT3G24255	AT3G10525
			AT4G17240	AT5G10625	AT2G29130	AT4G23520	AT3G10740
			AT4G17680	AT2G47780	AT2G29370	AT1G45616	AT3G10970
			AT4G18260	AT4G34320	AT2G29630	AT1G09240	AT3G11050
			AT4G18280	AT1G08310	AT2G29750	AT4G30660	AT3G11150
			AT4G18440	AT3G09922	AT2G30040	AT2G34790	AT3G11410
			AT4G18640	AT1G01453	AT2G30230	AT4G16190	AT3G11430
			AT4G19020	AT1G17020	AT2G30310	AT2G32430	AT3G11660
			AT4G19120	AT3G05160	AT2G30830	AT1G70680	AT3G11930
			AT4G20210	AT5G23750	AT2G30840	AT2G31830	AT3G12203
			AT4G20370	AT1G70680	AT2G30950	AT3G25870	AT3G12520
			AT4G20970	AT2G40435	AT2G31040	AT3G14690	AT3G12960
			AT4G21400	AT4G31730	AT2G31100	AT5G57180	AT3G13672
			AT4G21410	AT1G15550	AT2G31370	AT4G22250	AT3G13900
			AT4G21650	AT3G27025	AT2G31530	A_84_P798436	AT3G14170
			AT4G21760	AT3G58710	AT2G31560	DQ108839	AT3G14185
			AT4G22233	AT5G05600	AT2G31930	AT1G78670	AT3G14270
			AT4G22530	AT2G43120	AT2G32100	AT4G38810	AT3G14280
			AT4G22790	DR348682	AT2G32150	AT5G53870	AT3G14360
			AT4G22870	AT1G53580	AT2G32160	TA30818_3702	AT3G14560
			AT4G23040	AT1G01420	AT2G32290	AT3G63210	AT3G14810
			AT4G23060	AT5G10300	AT2G32480	AT3G21600	AT3G15115
			AT4G23496	AT5G48700	AT2G32487	AT2G39920	AT3G15890
			AT4G23500	AT4G36000	AT2G32530	AT5G58650	AT3G17180
			AT4G23600	AT1G72200	AT2G32540	AT1G03495	AT3G17520
			AT4G24010	AT5G03545	AT2G32610	AT4G17690	AT3G18570
			AT4G24250	AT3G05400	AT2G32795	AT1G65480	AT3G19150
			AT4G24350	AT5G10410	AT2G32870	TA37316_3702	AT3G19170
			AT4G24510	AT5G58900	AT2G33350	NP230661	AT3G19390
			AT4G25260	AT5G22355	AT2G33385	AT3G20100	AT3G19620
			AT4G25770	AT4G15550	AT2G33480	AT1G75380	AT3G19900
			AT4G25780	AT2G11810	AT2G33540	AT1G26560	AT3G20100
			AT4G26010	TA42879_3702	AT2G34070	AT5G45950	AT3G20300
			AT4G26540	AT5G15410	AT2G34080	AT5G40850	AT3G20640
			AT4G26940	AT1G52880	AT2G34490	AT4G28530	AT3G21250
			AT4G27300	AT3G50940	AT2G34660	AT2G45380	AT3G21550
			AT4G27430	AT1G11190	AT2G34790	BP799962	AT3G21600
			AT4G27435	PUP1	AT2G34850	AT4G15110	AT3G21670
			AT4G27590	AT5G40890	AT2G35060	CB255404	AT3G21710
			AT4G28250	AT4G22680	AT2G35200	AT3G05165	AT3G21720
			AT4G28490	AT3G03480	AT2G35210	AT5G25810	AT3G22560
			AT4G29690	AT2G36090	AT2G35860	AT5G10300	AT3G22740
			AT4G29700	AT4G15765	AT2G35945	AT3G20810	AT3G22830
			AT4G29930	AT5G27930	AT2G36090	AT1G22640	AT3G23180
			AT4G30340	AT4G31780	AT2G36310	AT4G11485	AT3G23410
			AT4G31110	AT2G45210	AT2G36320	A_84_P754320	AT3G23590
			AT4G31780	AT5G42210	AT2G36390	AT4G26080	AT3G23790
			AT4G31820	AT1G53870	AT2G36450	AT1G23400	AT3G23870
			AT4G32000	AT1G25530	AT2G36710	AT4G08290	AT3G24220
			AT4G32350	AT1G26820	AT2G36885	AT1G63010	AT3G24360
			AT4G32770	AT2G43580	AT2G37240	AT1G80440	AT3G24650
			AT4G33430	AT1G78670	AT2G37580	AT1G53210	AT3G24750
			AT4G34770	AT4G36010	AT2G37650	AT1G31820	AT3G25290
			AT4G34850	AT2G03710	AT2G37870	AT3G59580	AT3G25795
			AT4G35060	AT1G54575	AT2G37900	AT3G07940	AT3G25870
			AT4G35350	AT5G57760	AT2G38060	AT3G51870	AT3G27025
			AT4G36360	AT4G36410	AT2G38530	AT3G26290	AT3G27170
			AT4G36600	AT2G41480	AT2G38750	AT2G44255	AT3G27660
			AT4G37030	AT4G21870	AT2G38890	AK229901	AT3G27820
			AT4G37450	AT3G45010	AT2G39270	AT2G28200	AT3G28007
			AT4G37700	TA52495_3702	AT2G39780	AT1G14780	AT3G28270
			AT4G37930	AT1G03495	AT2G39800	AT3G14560	AT3G28345
			AT4G38530	AT2G04025	AT2G39850	AT1G51440	AT3G28360
			AT4G38690	AT4G24010	AT2G39920	AT1G27940	AT3G30460
			AT4G38770	AT2G34790	AT2G39980	AT5G57940	AT3G44460
			AT4G39320	AT1G16850	AT2G40100	AT1G13650	AT3G44540
			AT4G39800	AT5G62040	AT2G40435	AT4G25010	AT3G45010
			AT5G01210	AT3G57680	AT2G40460	AT3G23590	AT3G46520
			AT5G01930	AT1G22570	AT2G40470	AT3G57190	AT3G46660
			AT5G02090	AT3G61880	AT2G40670	AT2G37870	AT3G46670
			AT5G02200	AT4G37800	AT2G41000	AT3G04910	AT3G46890
			AT5G02750	FMO_GS-OX4	AT2G41225	DQ108818	AT3G47420
			AT5G02970	AT5G53870	AT2G41230	TA46300_3702	AT3G47510
			AT5G03260	AT3G48340	AT2G41400	AT5G66040	AT3G47950
			AT5G03270	AT5G07580	AT2G41475	FMO_GS-OX2	AT3G48340
			AT5G03510	AT4G28530	AT2G41480	AT3G17180	AT3G48520
			AT5G03545	AT5G42510	AT2G41610	AT3G46750	AT3G48740
			AT5G03730	AT1G79900	AT2G41690	AT1G15350	AT3G48990
			AT5G03760	AT1G48500	AT2G41870	AT5G62730	AT3G49210
			AT5G03795	AT3G05390	AT2G41940	AT2G17280	AT3G50340
			AT5G03960	AT5G57520	AT2G41970	AT3G21760	AT3G50350
			AT5G04000	AT5G23980	AT2G42280	AT1G66020	AT3G50390
			AT5G04190	AT3G28360	AT2G42365	AT3G21300	AT3G50440
			AT5G04200	AT2G32610	AT2G42540	AT1G17840	AT3G50840
			AT5G04230	AT2G37870	AT2G43010	AT1G80050	AT3G50940
			AT5G04330	AT5G04200	AT2G43100	AT5G47650	AT3G50970
			AT5G04690	AT1G07230	AT2G43120	AT5G57800	AT3G50980
			AT5G05240	AT3G53980	AT2G43580	AT1G68500	AT3G51750
			AT5G06560	AT3G27170	AT2G43590	AT2G01530	AT3G51870
			AT5G06570	AT5G49620	AT2G43700	AT1G56280	AT3G51895
			AT5G06710	AT3G28270	AT2G43880	AT3G02910	AT3G52820
			AT5G06800	AT3G21710	AT2G44160	AT4G32940	AT3G53300
			AT5G07030	AT1G68600	AT2G44300	AT4G31780	AT3G53980
			AT5G07080	AT4G18550	AT2G44810	AT3G09910	AT3G54020
			AT5G07460	AT4G32810	AT2G44850	AT4G37980	AT3G54200
			AT5G09220	AT5G25110	AT2G44940	TA28772_3702	AT3G54510
			AT5G09660	AT4G23990	AT2G45040	AT2G39800	AT3G54940
			AT5G09870	AT2G34850	AT2G45210	AT3G20640	AT3G55290
			AT5G10170	AT1G18870	AT2G45245	AT1G36320	AT3G55610
			AT5G10180	AT4G17220	AT2G45380	AT2G31085	AT3G55940
			AT5G10410	AT1G57590	AT2G45720	AT1G67370	AT3G56630
			AT5G10430	AT4G33550	AT2G45750	AT4G15563	AT3G56920
			AT5G10830	AT4G03400	AT2G46100	AT1G23800	AT3G57680
			AT5G11670	AT1G58270	AT2G46370	AT4G18270	AT3G57740
			AT5G12940	AT1G75620	AT2G46650	AT3G06830	AT3G57780
			AT5G13930	AT3G25795	AT2G46660	AT1G50020	AT3G58470
			AT5G14570	AT2G29750	AT2G46680	AT1G43790	AT3G58710
			AT5G15240	BE039502	AT2G46690	AT3G47430	AT3G58740
			AT5G15900	AT4G17030	AT2G46770	AT5G45850	AT3G59052
			AT5G16230	AT4G01985	AT2G46870	AT3G12520	AT3G59580
			AT5G16530	TA46301_3702	AT2G46880	AT3G05937	AT3G60690
			AT5G16600		AT2G47160	AT2G41970	AT3G60780
			AT5G17260		AT2G47270	AT5G58900	AT3G61060
			AT5G17420		AT2G47600	AT4G30540	AT3G61080
			AT5G17490		AT2G47670	AT1G75620	AT3G61220
			AT5G17520		AT2G47780	AT3G48520	AT3G61410
			AT5G18410		AT2G47910	AT3G53300	AT3G61420
			AT5G18860		AT2G47950	AT3G52740	AT3G61450
			AT5G18930		AT3G01350	AT5G25240	AT3G61880
			AT5G19470		AT3G01920	AT4G15550	AT3G61890
			AT5G20050		AT3G01961	AT4G34730	AT3G62090
			AT5G20710		AT3G01980	AT2G25964	AT3G62550
			AT5G20870		AT3G02020	AT1G46554	AT3G62590
			AT5G20970		AT3G02500	AT5G37730	AT3G62700
			AT5G21430		AT3G02720	AT1G53510	AT3G62730
			AT5G22460		AT3G02910	AT1G07720	AT3G62740
			AT5G22580		AT3G03170	AT4G30830	AT3G63040
			AT5G23750		AT3G03190	AT2G31560	AT3G63050
			AT5G23860		AT3G03450	AT3G54020	AT3G63330
			AT5G24580		AT3G03480	AT2G03980	AT3G63520
			AT5G24770		AT3G03540	TA31749_3702	AT4G01140
			AT5G24780		AT3G03650	AT4G31910	AT4G01440
			AT5G25110		AT3G03690	AT3G49070	AT4G01593
			AT5G25350		AT3G03830	AT3G61420	AT4G01985
			AT5G25460		AT3G04000	AT3G27820	AT4G03400
			AT5G25610		AT3G04030	AT1G11700	AT4G04460
			AT5G25830		AT3G04140	AT1G32100	AT4G04830
			AT5G25880		AT3G04170	AT2G47670	AT4G07408
			AT5G25980		AT3G04530	AT1G73602	AT4G08290
			AT5G26000		AT3G04910	AT5G18980	AT4G09600
			AT5G26190		AT3G05160	AT1G06980	AT4G09740
			AT5G27360		AT3G05165	AT5G04230	AT4G09820
			AT5G28910		AT3G05390	AT3G62550	AT4G09965
			AT5G35170		AT3G05400	AT2G31070	AT4G10310
			AT5G37180		AT3G05937	AT4G12350	AT4G11910
			AT5G37790		AT3G06070	AT5G40790	AT4G11960
			AT5G37950		AT3G06210	AT1G11410	AT4G12000
			AT5G37980		AT3G06483	AT1G62370	AT4G12350
			AT5G38000		AT3G06510	AT3G57680	AT4G12410
			AT5G38010		AT3G06550	AT4G36410	AT4G13450
			AT5G38100		AT3G06770	AT1G69230	AT4G13630
			AT5G38120		AT3G07020	AT1G65590	AT4G14730
			AT5G38130		AT3G07340	AT2G30230	AT4G14819
			AT5G38970		AT3G07700	AT2G04025	AT4G15110
			AT5G40020		AT3G07940	AT1G33440	AT4G15200
			AT5G41120		AT3G08490	AT1G26920	AT4G15400
			AT5G42710		AT3G08510	AT2G42280	AT4G15490
			AT5G43170		AT3G08840	AT3G52000	AT4G15550
			AT5G43380		AT3G09910	AT3G61450	AT4G15563
			AT5G43660		AT3G09922	AT1G28335	AT4G15620
			AT5G44210		AT3G10120	AT1G05310	AT4G15765
			AT5G44410		AT3G10130	AT5G11110	AT4G16160
			AT5G44540		AT3G10340	AT2G40435	AT4G16190
			AT5G45520		AT3G10370	AT3G23790	AT4G16620
			AT5G45530		AT3G10525	AT2G03710	AT4G16750
			AT5G45540		AT3G10740	AT3G04870	AT4G17030
			AT5G46370		AT3G10940	AT5G19870	AT4G17220
			AT5G46530		AT3G10970	AT4G18550	AT4G17280
			AT5G47100		AT3G11150	AT4G19700	AT4G17840
			AT5G47230		AT3G11480	AT1G62960	AT4G18070
			AT5G47240		AT3G11660	AT2G23760	AT4G18220
			AT5G47730		AT3G11680	AT5G09280	AT4G18270
			AT5G48900		AT3G12520	AT1G53870	AT4G18280
			AT5G49800		AT3G12660	AT1G57590	AT4G18425
			AT5G50210		AT3G12730	AT1G21920	AT4G18550
			AT5G50290		AT3G12780	AT3G21670	AT4G18740
			AT5G50335		AT3G13110	AT5G65470	AT4G19035
			AT5G50610		AT3G13672	AT1G02860	AT4G19170
			AT5G50950		AT3G14280	AT4G33550	AT4G19390
			AT5G51210		AT3G14370	AT5G24870	AT4G19700
			AT5G51780		AT3G14420	AT3G10740	AT4G19810
			AT5G51890		AT3G14450	TC373650	AT4G20480
			AT5G52050		AT3G14560	AT2G47270	AT4G20840
			AT5G52060		AT3G14810	AT1G67710	AT4G21550
			AT5G52250		AT3G15050	AT5G20790	AT4G21570
			AT5G52410		AT3G15300	AT5G50915	AT4G21870
			AT5G52800		AT3G15650	AT5G17520	AT4G22240
			AT5G53290		AT3G15840	AT5G51810	AT4G22270
			AT5G53592		AT3G15890	AT5G42210	AT4G22680
			AT5G53750		AT3G16340	AT1G73040	AT4G22990
			AT5G54060		AT3G16360	AT4G15490	AT4G23050
			AT5G55730		AT3G16920	AT3G62700	AT4G23060
			AT5G56620		AT3G17180	AT5G60360	AT4G23430
			AT5G56840		AT3G17800	AT3G19620	AT4G23560
			AT5G56950		AT3G17860	AT1G17830	AT4G23600
			AT5G56980		AT3G18140	AT3G05160	AT4G23990
			AT5G57630		AT3G18500	AT1G75370	AT4G24000
			AT5G57670		AT3G18660	AT5G39080	AT4G24010
			AT5G57760		AT3G19150	AT2G45210	AT4G24430
			AT5G59250		AT3G19170	AT3G22830	AT4G25140
			AT5G59730		AT3G19390	AT3G15780	AT4G25433
			AT5G60100		AT3G19550	AT1G33270	AT4G25450
			AT5G60310		AT3G19620	TA28000_3702	AT4G25860
			AT5G60650		AT3G19900	AT5G18650	AT4G26080
			AT5G60660		AT3G20080	PUP1	AT4G26150
			AT5G60890		AT3G20100	AT5G51890	AT4G26220
			AT5G61270		AT3G20300	AT4G40060	AT4G27140
			AT5G62360		AT3G20640	AT2G38170	AT4G27150
			AT5G62940		AT3G21240	AT3G10340	AT4G27160
			AT5G63450		AT3G21250	AT3G23410	AT4G27170
			AT5G64740		AT3G21510	AT2G32540	AT4G27250
			AT5G64750		AT3G21520	AT5G25210	AT4G27520
			AT5G65280		AT3G21550	TA30874_3702	AT4G27530
			AT5G65925		AT3G21600	AT5G05110	AT4G28520
			AT5G66040		AT3G21670	AT3G28360	AT4G28530
			AT5G66080		AT3G21710	AT1G09350	AT4G29670
			AT5G66620		AT3G21750	AT3G21710	AT4G30460
			AT5G67020		AT3G21970	AT2G47910	AT4G30470
			AT5G67090		AT3G22240	AT4G34588	AT4G30540
			AT5G67460		AT3G22415	AT5G10410	AT4G30830
			AY090969		AT3G22550	AT5G15500	AT4G31248
			BETA-OHASE_2		AT3G22830	AT3G49760	AT4G31370
			BP563965		AT3G23240	AT5G54960	AT4G31420
			BP604541		AT3G23410	AT2G32530	AT4G31730
			BX818802		AT3G23590	AT5G25280	AT4G31780
			CD529700		AT3G23600	AT3G61880	AT4G31990
			CK119851		AT3G23790	AT3G48350	AT4G32190
			CPHSC70-2EAT_SHOCK_PROTEIN_70-2		AT3G24150	AT1G52590	AT4G32250
			DQ108837		AT3G24260	AT4G37140	AT4G32320
			DR232279		AT3G24360	AT1G32450	AT4G32350
			DR359164		AT3G25620	AT5G57760	AT4G32770
			DR749595		AT3G25690	AT3G28007	AT4G32810
			DR750066		AT3G25795	AT5G54585	AT4G32940
			EG522742		AT3G25870	AT1G79900	AT4G33150
			ESP		AT3G26380	AT2G24762	AT4G33370
			FMO_GS-OX2		AT3G26490	AT3G54140	AT4G33550
			NP043404		AT3G26580	AT5G42510	AT4G33810
			NP044150		AT3G26960	AT5G40020	AT4G33820
			NP12629637		AT3G27025	AT2G46860	AT4G34320
			NP221616		AT3G27110	AV813724	AT4G34330
			NP227289		AT3G27170	AT4G32810	AT4G34510
			NP236409		AT3G27580	FMO_GS-OX4	AT4G34520
			NP236809		AT3G27809	AT5G65990	AT4G34600
			PUP1		AT3G27820	AT2G43120	AT4G35560
			TA26139_3702		AT3G28007	AT5G21020	AT4G35790
			TA27069_3702		AT3G28200	AT5G03190	AT4G36000
			TA27415_3702		AT3G28270	AT1G61810	AT4G36010
			TA29460_3702		AT3G28360	AT2G45180	AT4G36060
			TA29805_3702		AT3G28820	AT1G11210	AT4G36410
			TA32462_3702		AT3G28830	AT2G02080	AT4G36700
			TA33113_3702		AT3G28958	AT3G50940	AT4G36850
			TA36674_3702		AT3G29590	AT5G09990	AT4G37050
			TA38423_3702		AT3G29636	AT1G52880	AT4G37140
			TA40086_3702		AT3G29670	AT2G35060	AT4G37420
			TA40382_3702		AT3G30580	AT4G34530	AT4G37760
			TA45910_3702		AT3G42155	AT4G03400	AT4G37800
			TA49069_3702		AT3G43083	AT5G04950	AT4G37980
			TA49792_3702		AT3G44220	AT3G53980	AT4G38460
			TA50316_3702		AT3G44250	AT1G04890	AT4G38810
			TA51974_3702		AT3G44310	BP848451	AT4G39130
			TA52710_3702		AT3G44990	TA28120_3702	AT4G39210
			TA53053_3702		AT3G45010	AT4G23600	AT4G39730
			TC366629		AT3G45280	AT2G45720	AT4G40070
			TC397723		AT3G46650	AT5G10946	AT5G01520
			TC400787		AT3G47350	AT1G25250	AT5G01790
			TC403018		AT3G47420	AT1G26820	AT5G01810
					AT3G47510	AT4G18280	AT5G02020
					AT3G47960	AT1G18870	AT5G02170
					AT3G48340	AT3G03170	AT5G03190
					AT3G48520	DR348682	AT5G03260
					AT3G48960	AT1G49310	AT5G03545
					AT3G48990	AT4G13450	AT5G03640
					AT3G50010	AT4G32190	AT5G03820
					AT3G50220	TA42879_3702	AT5G04000
					AT3G50310	AT2G36710	AT5G04010
					AT3G50340	AT1G02000	AT5G04200
					AT3G50440	AT1G09530	AT5G04220
					AT3G50450	AT3G28270	AT5G04250
					AT3G50820	AT5G50800	AT5G04370
					AT3G50840	AT1G14280	AT5G04380
					AT3G50940	AT2G47340	AT5G04390
					AT3G51090	AT1G49640	AT5G04460
					AT3G51325	A_84_P732596	AT5G04900
					AT3G51750	AT4G26790	AT5G04950
					AT3G51830	AT3G58470	AT5G05020
					AT3G51870	AT1G52080	AT5G05110
					AT3G51895	AT3G45010	AT5G05600
					AT3G52180	AT2G22970	AT5G07000
					AT3G52780	AT4G37970	AT5G07010
					AT3G53090	AT1G70230	AT5G07420
					AT3G53100	AT5G56860	AT5G07500
					AT3G53300	AT1G25530	AT5G07580
					AT3G53450	AT1G69252	AT5G07920
					AT3G53800	AT1G01420	AT5G08250
					AT3G53980	AT5G40960	AT5G08480
					AT3G54020	AT4G17030	AT5G08500
					AT3G54040	AT3G48240	AT5G09640
					AT3G54600	AT5G03545	AT5G10120
					AT3G55290	AT5G57520	AT5G10300
					AT3G55610	AT5G44005	AT5G10410
					AT3G55760	AT2G41870	AT5G10625
					AT3G55970	AT4G36060	AT5G10946
					AT3G56040	AT4G08570	AT5G10990
					AT3G56060	AT2G31380	AT5G11110
					AT3G56200	AT5G62040	AT5G11360
					AT3G56380	AT5G55180	AT5G11840
					AT3G56630	AT4G20840	AT5G12460
					AT3G57510	AT2G26690	AT5G13170
					AT3G57680	AT2G41480	AT5G13580
					AT3G58060	AT1G15550	AT5G13650
					AT3G58470	AT5G44190	AT5G13700
					AT3G58620	AT4G19390	AT5G13730
					AT3G58710	AT5G23950	AT5G13750
					AT3G58790	AT4G24000	AT5G15100
					AT3G58970	AT4G39730	AT5G15240
					AT3G59052	AT5G23870	AT5G15410
					AT3G59580	AT2G01890	AT5G15500
					AT3G59900	AT1G09850	AT5G15900
					AT3G60130	AT2G43580	AT5G16120
					AT3G60290	AT2G29370	AT5G16460
					AT3G61220	AT5G37500	AT5G17520
					AT3G61420	AT2G42540	AT5G17860
					AT3G61450	AT3G19150	AT5G18130
					AT3G61460	AT4G38690	AT5G18475
					AT3G61700	AT5G02420	AT5G18840
					AT3G61830	AT1G54120	AT5G18980
					AT3G61880	AT5G15410	AT5G19530
					AT3G61890	AT1G54570	AT5G19870
					AT3G61910	AT5G53486	AT5G20150
					AT3G62020	AT5G40890	AT5G20280
					AT3G62160	TA28014_3702	AT5G20410
					AT3G62550	AT2G29750	AT5G20790
					AT3G62700	AT3G51750	AT5G21020
					AT3G62990	AT2G28305	AT5G22355
					AT3G63330	AT3G48340	AT5G22470
					AT3G63520	AT4G24430	AT5G22810
					AT4G00040	AT3G52620	AT5G23050
					AT4G00305	AT5G25610	AT5G23750
					AT4G00630	AT3G04530	AT5G23870
					AT4G01440	AT1G16850	AT5G23950
					AT4G01593	AK229202	AT5G23980
					AT4G01600	AT2G34850	AT5G24770
					AT4G01985	AT3G22840	AT5G24860
					AT4G03020	AT1G50630	AT5G24870
					AT4G03030	AT5G43180	AT5G25110
					AT4G03038	AT5G28300	AT5G25130
					AT4G03039	AT1G48000	AT5G25240
					AT4G03070	AT1G62510	AT5G25280
					AT4G03390	AT4G17220	AT5G25330
					AT4G03400	AT1G22990	AT5G25350
					AT4G03410	AT1G06090	AT5G25610
					AT4G03455	AT1G73880	AT5G25810
					AT4G04750	AT5G23750	AT5G26010
					AT4G05160	AT5G43840	AT5G27150
					AT4G08170	AT1G14730	AT5G27410
					AT4G08290	AT2G36090	AT5G27930
					AT4G09020	AT5G01520	AT5G28300
					AT4G09350	AT4G26150	AT5G35660
					AT4G09740	AT5G04200	AT5G37500
					AT4G09890	AT3G55610	AT5G37730
					AT4G09965	AT1G46768	AT5G39610
					AT4G09984	AT4G34320	AT5G40380
					AT4G09990	AT3G14395	AT5G40420
					AT4G10290	TC372325	AT5G40640
					AT4G10310	AT1G47960	AT5G40850
					AT4G10380	AT1G27200	AT5G40890
					AT4G10440	AT3G21460	AT5G40960
					AT4G11960	AT1G51140	AT5G41040
					AT4G11980	AT3G05400	AT5G41800
					AT4G12030	AT3G14280	AT5G42200
					AT4G12350	TA26074_3702	AT5G42210
					AT4G12450	AT1G48500	AT5G42270
					AT4G13250	AT5G25110	AT5G42510
					AT4G13440	TA46301_3702	AT5G42580
					AT4G13450	AT1G58270	AT5G42800
					AT4G13550	NP236646	AT5G43150
					AT4G13770	AT5G10930	AT5G43180
					AT4G13790	AT4G25433	AT5G43770
					AT4G14020	AT4G18830	AT5G43780
					AT4G14070	AT5G28080	AT5G44120
					AT4G14090	NP043404	AT5G44190
					AT4G14440	AT3G19390	AT5G44310
					AT4G14760	AT2G35070	AT5G45690
					AT4G14819	AT3G14810	AT5G45770
					AT4G15110	BE039502	AT5G45830
					AT4G15440	AT1G07230	AT5G46180
					AT4G15490	AT4G01985	AT5G46830
					AT4G15550	AT2G21590	AT5G47530
					AT4G15563	AT1G08440	AT5G47810
					AT4G15765	AT3G25795	AT5G48700
					AT4G16024	AT3G50840	AT5G48950
					AT4G16146	AT5G63800	AT5G49620
					AT4G16190	AT3G61900	AT5G49990
					AT4G16550	AT3G20300	AT5G50100
					AT4G16590	AT2G47780	AT5G50240
					AT4G16730	AT5G23980	AT5G50750
					AT4G16740	AT5G05020	AT5G50770
					AT4G16750		AT5G50800
					AT4G17030		AT5G50915
					AT4G17220		AT5G50940
					AT4G17360		AT5G50950
					AT4G17470		AT5G51210
					AT4G18070		AT5G51490
					AT4G18220		AT5G51680
					AT4G18240		AT5G51810
					AT4G18270		AT5G51890
					AT4G18280		AT5G52300
					AT4G18350		AT5G53486
					AT4G18550		AT5G53870
					AT4G18740		AT5G54585
					AT4G18810		AT5G54740
					AT4G19170		AT5G54960
					AT4G19390		AT5G55180
					AT4G19530		AT5G55240
					AT4G19700		AT5G55750
					AT4G20370		AT5G56160
					AT4G20840		AT5G56520
					AT4G20930		AT5G56760
					AT4G21200		AT5G57040
					AT4G21210		AT5G57260
					AT4G21215		AT5G57520
					AT4G21230		AT5G57610
					AT4G21400		AT5G57760
					AT4G21410		AT5G57790
					AT4G21550		AT5G57800
					AT4G21570		AT5G57940
					AT4G21650		AT5G58310
					AT4G21760		AT5G58360
					AT4G21870		AT5G58650
					AT4G21910		AT5G58690
					AT4G21930		AT5G58900
					AT4G22090		AT5G59320
					AT4G22233		AT5G59330
					AT4G22240		AT5G59340
					AT4G22680		AT5G59845
					AT4G22760		AT5G60360
					AT4G22790		AT5G60600
					AT4G22940		AT5G61590
					AT4G22990		AT5G61680
					AT4G23000		AT5G61720
					AT4G23060		AT5G62040
					AT4G23430		AT5G62220
					AT4G23560		AT5G62490
					AT4G23600		AT5G62720
					AT4G23890		AT5G63800
					AT4G23990		AT5G64080
					AT4G24000		AT5G64750
					AT4G24010		AT5G65165
					AT4G24015		AT5G65200
					AT4G24430		AT5G65210
					AT4G24450		AT5G65470
					AT4G25040		AT5G65990
					AT4G25160		AT5G66040
					AT4G25433		AT5G66985
					AT4G25650		AT5G67180
					AT4G25770		AT5G67245
					AT4G25860		AT5G67480
					AT4G26080		AT5G67520
					AT4G26150		AV558444
					AT4G27250		AV788815
					AT4G27435		AV813724
					AT4G27520		AY334555
					AT4G27570		BE039502
					AT4G27800		BP603152
					AT4G28040		BX821260
					AT4G28088		CD532105
					AT4G28380		DQ108839
					AT4G28500		DR348682
					AT4G28530		DR382814
					AT4G29305		FMO_GS-OX2
					AT4G29670		FMO_GS-OX4
					AT4G29930		HYP1
					AT4G30450		NP041809
					AT4G30470		NP221616
					AT4G30540		NP231112
					AT4G30830		NP231273
					AT4G31354		NP332587
					AT4G31420		PUP1
					AT4G31730		SUS3
					AT4G31780		TA26074_3702
					AT4G31990		TA27151_3702
					AT4G32190		TA28014_3702
					AT4G32250		TA28590_3702
					AT4G32320		TA28635_3702
					AT4G32350		TA28710_3702
					AT4G32714		TA28772_3702
					AT4G32810		TA29188_3702
					AT4G32850		TA30223_3702
					AT4G32940		TA30280_3702
					AT4G33010		TA30874_3702
					AT4G33030		TA31749_3702
					AT4G33090		TA31828_3702
					AT4G33150		TA33465_3702
					AT4G33450		TA37316_3702
					AT4G33490		TA39438_3702
					AT4G33550		TA40086_3702
					AT4G34060		TA42879_3702
					AT4G34320		TA46300_3702
					AT4G34600		TA46301_3702
					AT4G34920		TA48802_3702
					AT4G35760		TA51100_3702
					AT4G36000		TA51152_3702
					AT4G36010		TA52229_3702
					AT4G36060		TA52495_3702
					AT4G36195		TA52555_3702
					AT4G36410		TC365304
					AT4G36530		TC372325
					AT4G36648		TC375116
					AT4G36870		TC400087
					AT4G37140
					AT4G37150
					AT4G37230
					AT4G37320
					AT4G37420
					AT4G37430
					AT4G37470
					AT4G37800
					AT4G37930
					AT4G37980
					AT4G38230
					AT4G38300
					AT4G38460
					AT4G38530
					AT4G38545
					AT4G38810
					AT4G38825
					AT4G39090
					AT4G39140
					AT4G39210
					AT4G39230
					AT4G39410
					AT4G39730
					AT5G01520
					AT5G01740
					AT5G01770
					AT5G02170
					AT5G02620
					AT5G02940
					AT5G02970
					AT5G03170
					AT5G03190
					AT5G03545
					AT5G03760
					AT5G04200
					AT5G04360
					AT5G04460
					AT5G04480
					AT5G04900
					AT5G04950
					AT5G05020
					AT5G05110
					AT5G05200
					AT5G05590
					AT5G05600
					AT5G05960
					AT5G06250
					AT5G06260
					AT5G06865
					AT5G07580
					AT5G08150
					AT5G08500
					AT5G08750
					AT5G09550
					AT5G09620
					AT5G09660
					AT5G09670
					AT5G09870
					AT5G10180
					AT5G10300
					AT5G10410
					AT5G10625
					AT5G10650
					AT5G10830
					AT5G10946
					AT5G11070
					AT5G11110
					AT5G11840
					AT5G12950
					AT5G13550
					AT5G13730
					AT5G14120
					AT5G14200
					AT5G14510
					AT5G14590
					AT5G15254
					AT5G15410
					AT5G15500
					AT5G15630
					AT5G15830
					AT5G15900
					AT5G16350
					AT5G16410
					AT5G16530
					AT5G16560
					AT5G17165
					AT5G17170
					AT5G17220
					AT5G17420
					AT5G17480
					AT5G17520
					AT5G17860
					AT5G18030
					AT5G18475
					AT5G18860
					AT5G18980
					AT5G19040
					AT5G19140
					AT5G19470
					AT5G19530
					AT5G19540
					AT5G19870
					AT5G20045
					AT5G20190
					AT5G20280
					AT5G20670
					AT5G20700
					AT5G20790
					AT5G21020
					AT5G21050
					AT5G21482
					AT5G22355
					AT5G22460
					AT5G22510
					AT5G22760
					AT5G22800
					AT5G23010
					AT5G23020
					AT5G23030
					AT5G23050
					AT5G23240
					AT5G23660
					AT5G23750
					AT5G23870
					AT5G23950
					AT5G23980
					AT5G24770
					AT5G24780
					AT5G24860
					AT5G24870
					AT5G25110
					AT5G25130
					AT5G25140
					AT5G25190
					AT5G25240
					AT5G25280
					AT5G25350
					AT5G25610
					AT5G25810
					AT5G25830
					AT5G26570
					AT5G26940
					AT5G27280
					AT5G27350
					AT5G27710
					AT5G27930
					AT5G28300
					AT5G37478
					AT5G37500
					AT5G37730
					AT5G38700
					AT5G39090
					AT5G39493
					AT5G39520
					AT5G39610
					AT5G40210
					AT5G40240
					AT5G40270
					AT5G40380
					AT5G40640
					AT5G40850
					AT5G40890
					AT5G40960
					AT5G41120
					AT5G41315
					AT5G41663
					AT5G41900
					AT5G42210
					AT5G42270
					AT5G42390
					AT5G42510
					AT5G42580
					AT5G42710
					AT5G42800
					AT5G43160
					AT5G43170
					AT5G43180
					AT5G43745
					AT5G43750
					AT5G43780
					AT5G44030
					AT5G44130
					AT5G44190
					AT5G44250
					AT5G45890
					AT5G46180
					AT5G46330
					AT5G46420
					AT5G46650
					AT5G46830
					AT5G46940
					AT5G47040
					AT5G47240
					AT5G47370
					AT5G47640
					AT5G47740
					AT5G47860
					AT5G48370
					AT5G48700
					AT5G48900
					AT5G49050
					AT5G49600
					AT5G49620
					AT5G50100
					AT5G50130
					AT5G50400
					AT5G50800
					AT5G50890
					AT5G50915
					AT5G50920
					AT5G50940
					AT5G50950
					AT5G51330
					AT5G51680
					AT5G51810
					AT5G51890
					AT5G52030
					AT5G52310
					AT5G52320
					AT5G52882
					AT5G53120
					AT5G53350
					AT5G53486
					AT5G53750
					AT5G53870
					AT5G54060
					AT5G54160
					AT5G54240
					AT5G54390
					AT5G54570
					AT5G54585
					AT5G54690
					AT5G54870
					AT5G54960
					AT5G55050
					AT5G55180
					AT5G55910
					AT5G56160
					AT5G56520
					AT5G56760
					AT5G56870
					AT5G56880
					AT5G57040
					AT5G57520
					AT5G57630
					AT5G57670
					AT5G57760
					AT5G57785
					AT5G57800
					AT5G57840
					AT5G57930
					AT5G57940
					AT5G58310
					AT5G58360
					AT5G58570
					AT5G58650
					AT5G58690
					AT5G58770
					AT5G58870
					AT5G58900
					AT5G59130
					AT5G59320
					AT5G60360
					AT5G60600
					AT5G60660
					AT5G61420
					AT5G61430
					AT5G61590
					AT5G61720
					AT5G61930
					AT5G62040
					AT5G62140
					AT5G62165
					AT5G62350
					AT5G62680
					AT5G62720
					AT5G62950
					AT5G63060
					AT5G63450
					AT5G63610
					AT5G63800
					AT5G63970
					AT5G63980
					AT5G64280
					AT5G64572
					AT5G65200
					AT5G65280
					AT5G65450
					AT5G65470
					AT5G65990
					AT5G66040
					AT5G66558
					AT5G66670
					AT5G66770
					AT5G67020
					AT5G67230
					AT5G67245
					AV813724
					AY080619
					BE038180
					BE039478
					BE039502
					BP563965
					BP639994
					BP844931
					BX821260
					BX838014
					BX840213
					CNS0AD1M
					DQ108742
					DQ108828
					DQ108839
					DR348682
					DR359164
					DR377353
					DR379026
					DR749595
					ESP
					FMO_GS-OX2
					FMO_GS-OX3
					FMO_GS-OX4
					MIF3
					N38085
					N65547
					NP034015
					NP1098898
					NP13348143
					NP221616
					NP222049
					NP226468
					NP227289
					NP230514
					NP231112
					NP236597
					NP236809
					NP332587
					NP453868
					NP454692
					PUP1
					R30125
					TA26074_3702
					TA26755_3702
					TA26828_3702
					TA27069_3702
					TA27151_3702
					TA28014_3702
					TA28144_3702
					TA28264_3702
					TA28635_3702
					TA28772_3702
					TA30280_3702
					TA30874_3702
					TA31749_3702
					TA31912_3702
					TA33300_3702
					TA33368_3702
					TA33726_3702
					TA33765_3702
					TA33950_3702
					TA34480_3702
					TA37232_3702
					TA37316_3702
					TA37747_3702
					TA38053_3702
					TA38423_3702
					TA39576_3702
					TA40801_3702
					TA42341_3702
					TA42527_3702
					TA42879_3702
					TA43449_3702
					TA46300_3702
					TA46301_3702
					TA48802_3702
					TA49590_3702
					TA51152_3702
					TA51174_3702
					TA51521_3702
					TA52495_3702
					TA52512_3702
					TA52555_3702
					TC361820
					TC368905
					TC370633
					TC372325
					TC381707
					TC384346
					TC391625
					TC400087
					#N/A
